1 **B cell humoral response and differentiation is regulated by the non-canonical poly(A)**  
2 **polymerase TENT5C.**

3  
4 Aleksandra Bil ska<sup>1#</sup>, Monika Kusio-Kobiał ka<sup>1,2#</sup>, Paweł S. Krawczyk<sup>2</sup>, Olga Gewartowska<sup>2,1</sup>, Bartosz  
5 Tarkowski<sup>2</sup>, Kamil Kobył ecki<sup>2</sup>, Jakub Gruchota<sup>2</sup>, Ewa Borsuk<sup>2,3</sup>, Andrzej Dziembowski<sup>1,2,4\*</sup> and  
6 Seweryn Mroczek<sup>1,2\*</sup>

7  
8 <sup>1</sup>Institute of Genetics and Biotechnology, Faculty of Biology, University of Warsaw, Pawinskiego  
9 5a, 02-106 Warsaw, Poland

10 <sup>2</sup>Institute of Biochemistry and Biophysics, Polish Academy of Sciences, Pawinskiego 5a, 02-106  
11 Warsaw, Poland

12 <sup>3</sup>Department of Embryology, Institute of Zoology, Faculty of Biology, University of Warsaw,  
13 Miecznikowa 1, 02-096 Warsaw, Poland

14 <sup>4</sup>Lead Contact

15 <sup>#</sup>These authors contributed equally

16 <sup>\*</sup>Correspondence: [andrzejd@ibb.waw.pl](mailto:andrzejd@ibb.waw.pl) (A.D.), [seweryn.mroczek@gmail.com](mailto:seweryn.mroczek@gmail.com) (S.M.)

17 Keywords: immunoglobulins, B cells, non-canonical polyadenylation, ncPAP, TENT5C, FAM46C

18

19

20

21

22

23

24

25

26

27

28

29

30

## 31 **Summary**

32 TENT5C is a non-canonical cytoplasmic poly(A) polymerase (ncPAP) upregulated in  
33 activated B cells and suppressing their proliferation. Herein we measured the global distribution of  
34 poly(A) tail lengths in responsive B cells using a modified Nanopore direct RNA-sequencing  
35 approach and revealed that TENT5C polyadenylates immunoglobulin mRNAs regulating their  
36 steady-state levels. Consequently, TENT5C deficient B cells secrete less antibodies and KO mice  
37 have diminished gamma globulin concentrations despite the increased number of CD138<sup>high</sup> plasma  
38 cells as a consequence of accelerated differentiation. TENT5C is explicitly upregulated in  
39 differentiating plasma cells by innate signaling. Importantly, TENT5C deficiency in B lymphocytes  
40 impairs the capacity of the secretory pathway through the reduction of ER volume and  
41 downregulation of unfolded protein response.

42 Our findings define the role of the TENT5C enzyme in B cell physiology and discover the  
43 first ncPAP engaged in the regulation of immunoglobulin mRNA poly(A) tails, thus serving as a  
44 regulator of humoral immunity.

45  
46

## 47 **Introduction**

48 Development of an adaptive humoral immune response requires activation of resting B cells  
49 following antigen recognition. This process is associated with structural and functional changes  
50 leading to the generation of high-affinity memory B cells and antibody-secreting plasma cells (ASC).  
51 Extensive B cell differentiation is characterized by the clonal expansion, somatic hypermutation  
52 leading to affinity maturation, isotype switching, and formation of ASC or memory cells. At a cellular  
53 level, this process involves the reorganization of the rough endoplasmic reticulum (ER) and Golgi  
54 compartments to promote immunoglobulin synthesis, assembly and secretion (Lynes and Simmen,  
55 2011; Wiest et al., 1990). These global physiological changes occurring during B cell differentiation  
56 and activation are linked to broad changes in the transcriptomic profile which is controlled by the  
57 coordinated action of regulatory networks of transcriptional factors such as NF- $\kappa$ B, BCL6, IRF4, and  
58 BLIMP1 (De Silva and Klein, 2015). Recent studies have also revealed the involvement of RNA-  
59 binding proteins (RBPs) and microRNAs (miRNAs) in shaping the B cell transcriptome (Danger et  
60 al., 2014; Diaz-Munoz et al., 2017), suggesting that post-transcriptional gene expression regulation  
61 plays an important role in B cell physiology (Koralov et al., 2008; Thai et al., 2007; Vigorito et al.,  
62 2007; Xu et al., 2012). In addition to global transcript changes, B cell maturation is associated with a  
63 large increase in the translation of mRNAs targeted to the ER (Goldfinger et al., 2011; Wiest et al.,  
64 1990).

65           Essentially, every mRNA molecule, except histone mRNAs, is polyadenylated during 3' end  
66 processing. Nuclear polyadenylation is mediated by canonical poly(A) polymerases that interact with  
67 3' end cleavage machinery. The poly(A) tail plays a critical role in mRNA stability and translation  
68 efficacy as nearly all mRNA decay pathways begin with the removal of poly(A) tails (Houseley and  
69 Tollervey, 2009; Hrit et al., 2014; Siwaszek et al., 2014). Previous studies of polyadenylation in B  
70 cells have largely focused on the role of alternative polyadenylation and splicing in the regulation of  
71 immunoglobulin isoforms (Enders et al., 2014; Peng et al., 2017; Pioli et al., 2014; Takagaki and  
72 Manley, 1998). However, in addition to the polyadenylation that occurs in the nucleus, the poly(A)  
73 tail can be expanded in the cytoplasm by non-canonical poly(A) polymerases (ncPAPs). This process  
74 is considered to play an important role in the activation of dormant deadenylated mRNAs during  
75 gametogenesis (Friday and Keiper, 2015) and in neuronal processes but has not yet been studied in B  
76 cells. We and others have recently identified a novel metazoan-specific family of cytoplasmic poly(A)  
77 polymerases, TENT5 (previously known as FAM46). In mammals, this family has 4 members  
78 (Kuchta et al., 2009; Kuchta et al., 2016; Mroczek et al., 2017), among which TENT5C is the best-  
79 characterized. The importance of TENT5C is underscored by the occurrence of TENT5C somatic  
80 mutations in about 20% of cases of multiple myeloma (MM) patients. Further work revealed that  
81 TENT5C is a *bona fide* MM cell growth suppressor (Mroczek et al., 2017; Zhu et al., 2017). TENT5C  
82 polyadenylates multiple mRNAs with a strong specificity to those encoding ER-targeted proteins.  
83 This partially explains TENT5C toxicity to MM cells since an increased protein load caused by the  
84 stabilization of ER-targeted mRNAs enhances the ER stress, to which MM is very sensitive. Initial  
85 characterization of TENT5C KO in mice revealed that it might play a role in the physiology of normal  
86 B cells since isolated primary splenocytes from TENT5C KO mice proliferate faster upon activation  
87 than those isolated from WT animals (Mroczek et al., 2017).

88           Here we studied the role of TENT5C in B cells in more detail. Using Nanopore direct RNA  
89 sequencing we have carried out a global analysis of poly(A) tail distribution in B cells from WT and  
90 TENT5C KO animals and determined that the primary targets of TENT5C are mRNAs encoding  
91 immunoglobulins (Ig). Basically, mRNAs encoding all classes of Ig had shorter poly(A) tails. The  
92 analysis also allowed us to draw some general conclusions about poly(A) tail dynamics such as the  
93 positive correlation between the length of the poly(A) tail and the mRNA expression level, which  
94 was previously questioned based on methods employing Illumina sequencing (Lima et al., 2017).

95           Importantly, further studies revealed that the production of immunoglobulins is lower in  
96 TENT5C KO B cells, leading to decreased gamma globulin concentrations in KO mice serum.  
97 TENT5C deficient cells are characterized by accelerated growth rate and faster differentiation to  
98 CD138<sup>high</sup> plasma cells, which explains their increased number in the bone marrow (BM) and spleen  
99 of KO mice. Accordingly, TENT5C expression is limited to late stages of B cell lineage

100 differentiation and is highly upregulated by innate signaling via specific Toll-like receptors (TLR).  
101 Despite the acceleration of B cell proliferation rate, a lack of TENT5C resulted in a decrease of ER  
102 compartment volume, reduced dynamic of its expansion during B cell activation, and downregulation  
103 of unfolded protein response. This, together with a decreased steady-state level of IgG mRNAs  
104 explain why TENT5C KO cells produce and secrete less antibodies.

105 In aggregate, we revealed that cytoplasmic polyadenylation by ncPAP TENT5C regulates the  
106 humoral immune response.

107

## 108 **Results**

### 109 **Direct RNA sequencing reveals IgG mRNAs as specific TENT5C targets**

110 TENT5C is implicated in the polyadenylation of mRNAs encoding proteins passing through  
111 the ER in multiple myeloma (MM) cells, which originate from terminally differentiated B cells  
112 (Mroczek et al., 2017). In order to identify TENT5C substrates in activated B cells, we implemented  
113 Oxford Nanopore Technologies (ONT) direct full-length RNA sequencing to measure poly(A) tail  
114 length at a genome-wide scale. Unlike traditional RNA-seq techniques, the Nanopore-based system  
115 detects DNA or RNA single molecules as they traverse through protein channels, without the need  
116 for an enzymatic synthesis reaction. Moreover, this sequencing strategy avoids limitations and biases  
117 introduced during amplification of long homopolymers such as adenine tracts within poly(A) tails as  
118 PCR amplification of cDNA is not required during library preparation (Feng et al., 2015; Garalde et  
119 al., 2018) (Figure 1A). In the case of RNA sequencing, the substrate is a whole single RNA molecule  
120 (or an RNA-DNA hybrid after optional reverse transcription) with the motor protein attached to its  
121 3'-end, which in an ATP-dependent manner passes the RNA strand through the pore at a consistent  
122 rate. As the sequencing proceeds in the 3' to 5' direction, the adaptor oligo is detected first, followed  
123 by the poly(A) tail, then the entire body of the transcript is sequenced. For efficient sequencing, pure  
124 mRNA fractions are needed, and to avoid any biases total RNA was subjected to an mRNA  
125 enrichment-step using the mutated recombinant elongation initiation factor 4E (GST-eIF4E<sup>K119A</sup>)  
126 which has a high affinity to 5'-cap structure (Bajak and Hagedorn, 2008; Choi and Hagedorn, 2003)  
127 (Supplementary Figure 1A-B). According to our experience and previous reports, this is the most  
128 effective strategy for mRNA enrichment (Choi and Hagedorn, 2003), as the efficiency of mRNA  
129 enrichment and depletion of other unwanted high-abundance RNA species was estimated by qPCR  
130 and northern blot analysis for selected transcripts (Supplementary Figure 1C-E). Next, samples  
131 depleted of most of small non-coding RNAs and rRNAs, were subjected to one round of ribodepletion  
132 (Supplementary Figure 1C). RNA prepared in such a way isolated from LPS/IL4 activated, spleen-  
133 derived B cells (WT and TENT5C KO mice) was adapted for Nanopore direct-RNA sequencing with  
134 the MinION device (Garalde et al., 2018) (Figure 1A).



135 Using ONT sequencing, we have generated 1.5M of transcriptome-wide full-length native-  
136 strand mRNA reads, which provided reliable information about steady-state poly(A) tail length in  
137 responsive B cells. We observed no global change in the mRNA polyadenylation status between WT  
138 and *TENT5C* deficient cells (Figure 1B). However, mRNAs encoding immunoglobulins had their  
139 median length of the poly(A) tails significantly decreased from 83 in WT to 67 adenosines in KO  
140 cells. This was observed for transcripts encoding both heavy and light immunoglobulin chains (Figure  
141 1C, D). The effect was highly specific to IgG transcripts as poly(A) tails of other highly abundant  
142 mRNAs such as ribosomal proteins or mitochondrial transcripts were not affected at all  
143 (Supplementary Figure 1F, G). Finally, differential expression analysis based on ONT data showed  
144 that the abundance of Ig mRNAs was also decreased in *TENT5C* KO cells (Figure 1E, Supplementary  
145 Dataset 1).

146 In parallel with direct RNA-seq, we performed standard Illumina RNA sequencing, allowing  
147 us to perform a comparative correlation analysis between datasets. Again, Ig mRNAs were the most  
148 downregulated ones in *TENT5C* KO (Figure 1F, Supplementary Dataset 2), which was additionally  
149 confirmed by RT-qPCR (Figure 1G). Such strong specificity of *TENT5C* for IgG mRNAs is also  
150 clearly visible on the correlation scatterplot between the poly(A) tail length change and expression  
151 fold change (Supplementary Figure 1H). To verify RNA-seq data Ig expression, naïve, spleen-derived  
152 B cells from WT and KO mice were activated with LPS and IL4 and selected mRNAs were analyzed  
153 by northern blot. The IgG $\lambda$ , IgG $\kappa$  transcripts are indeed less abundant and migrate faster on the gel in  
154 *TENT5C* KO compared to those from WT, confirming that they are *TENT5C* substrates (Figure 1H).  
155 Importantly, *TENT5C* is the only one of the four members of the *TENT5* gene family expressed at  
156 detectable levels in B cells and undergoing strong induction during their activation and differentiation  
157 as we measured by real-time quantitative PCR (qPCR) (Supplementary Figure 1I). Interestingly, its  
158 expression positively correlates with upregulation of PABPC1 what suggest that mRNA  
159 polyadenylation contributes to transcriptional reprogramming of the B cells response  
160 (Supplementary Figure 1I).

161 Finally, analysis of our ONT sequencing data revealed that transcripts with high translation  
162 rates significantly differ in their 3' end polyadenylation status. Immunoglobulin transcripts possess  
163 significantly longer poly(A) tails compared to other highly abundant mRNAs which is opposed to  
164 previous reports indicating that short poly(A) tails are a conserved feature of highly expressed genes  
165 (Lima et al., 2017). For example, in an activated B cells mRNAs encoding ribosomal proteins have  
166 significantly shorter poly(A) tails (with a median value 50 bp) than immunoglobulin coding  
167 transcripts (with median values 80-120 bp) which are also highly expressed genes (Supplementary  
168 Figure 1H).

169

## 170 **B cells isolated from TENT5C KO produce less antibodies**

171 Next, we analyzed the impact of inefficient transcript polyadenylation on immunoglobulin  
172 production at the protein level using western blot. TENT5C KO B cells grown *in vitro* produced fewer  
173 antibodies than those isolated from WT littermates (both light and heavy chains) while levels of other  
174 secreted proteins: interleukin 6 (IL-6), as well as ER-associated chaperonin – GPR94 were not  
175 changed as much (Figure 2A). According to this, the analysis of media collected from B cell cultures  
176 confirmed a decreased level of secreted antibodies by activated TENT5C deficient B lymphocytes  
177 (Figure 2B). Moreover, flow cytometry revealed that the level of IgG1 positive-cells is significantly  
178 decreased in TENT5C deficient B cells after 3 days of activation with IL-4 and LPS *in vitro* (Figure  
179 2C).

180 Next, to evaluate the effect of these phenomena for the physiology of an organism, we  
181 assessed the intracellular (cytoplasmic) levels of IgG1 and IgA-positive cells in a population of  
182 CD138-positive cells isolated from bone marrow and spleen. The intracellular levels of  
183 immunoglobulins, in contrast to surface immunoglobulins, reflects secreting ability of these cells. As  
184 expected, the percentages of IgG1 and IgA-positive cells is lowered in TENT5C KO mice, which  
185 confirms altered immunoglobulin production (Figure 2D, E). To extend these studies, we applied  
186 blood serum electrophoresis to compare globulin fractions from WT and KO mice. In agreement with  
187 previous *in vitro* and *in vivo* cell analyses, we have found a substantial decrease of gamma globulin  
188 fraction (which contains mainly whole antibodies) in KO mice plasma reflecting alterations in their  
189 production and secretion by B cell lineage (Figure 2F). The effect was specific since total serum  
190 protein concentrations, as well as albumin, alpha and beta globulin plasma sub-fractions, were not  
191 changed. A slight decrease of alpha 2 globulin concentration in TENT5C KO serum is most likely a  
192 consequence of previously reported by us microcytic anemia (Mroczek et al., 2017) that develops in  
193 KO mice presumably as a result of inhibited globin synthesis, but not iron uptake deficiency as its  
194 levels were unchanged in the serum (Figure 2G).

195 In sum, we conclude that TENT5C KO leads to decreased immunoglobulin synthesis in mice.

## 196 197 **TENT5C is mainly expressed at late steps of B cell differentiation**

198 Next, to take advantage of cytometric techniques in further analyses of B cell lineages, we  
199 have generated a TENT5C-GFP *knock-in* mouse. Similarly to the previously published TENT5C-  
200 FLAG (Mroczek et al., 2017), the *knock-in* GFP mouse line did not display any gross phenotype.  
201 Subsequently, flow cytometry analyses of *in vitro* activated B cells isolated from TENT5C-GFP mice  
202 revealed a distinct GFP-positive cell population, absent in the non-tagged controls confirming the  
203 utility of our mouse model (Figure 3A). Naïve B cells from TENT5C-GFP mice and WT littermates  
204 were activated with LPS and IL-4 and subjected to cytometric analysis to measure TENT5C-GFP and

205 CD138 plasma cell markers levels in a time-dependent manner. This analysis revealed that TENT5C  
206 is mainly expressed in the population of CD138-positive cells what suggests the involvement of this  
207 enzyme at the last steps of B cell differentiation (Figure 3B). To confirm this hypothesis, we have  
208 systematically examined spleen and bone marrow-residing B cell and plasma cell subpopulations  
209 from young adult (12-15 weeks) unimmunized WT and TENT5C-GFP mice using multicolor flow  
210 cytometry. The GFP-tag *knock-in* does not affect the general distribution of B cell and plasma cell  
211 populations. However, this approach revealed that the CD138<sup>high</sup> B cell subset is also highly GFP-  
212 positive in both BM (up to 76%) and spleen (up to 93%) (Figure 3C). In turn, GFP-positive cells were  
213 not detected in B cell subsets at early stages of differentiation (Supplementary Figure 2). The detailed  
214 gating strategy is presented in Supplementary Figure 3 and 4. Thus TENT5C-GFP is mainly  
215 expressed in the last stages of B cell differentiation as revealed by detailed plasma cell subpopulation  
216 analyses including dividing plasmablast (CD19<sup>high</sup>/CD45R<sup>high</sup>), early plasma cells  
217 (CD19<sup>high</sup>/CD45R<sup>low</sup>) and mature resting plasma cells (CD19<sup>low</sup>/CD45R<sup>low</sup>) (Figure 3D and  
218 Supplementary Figure 4). Finally, we confirmed those results with immunostaining of spleen sections  
219 showing that GFP-fused TENT5C is mainly expressed in CD138-positive cells (Figure 3E).

220

### 221 **TENT5C expression is stimulated by innate signaling**

222 Next, to define whether other stimuli than a combination of LPS and IL-4 lead to TENT5C  
223 upregulation, we have tested main types of B cell activation. Naïve B cells isolated from TENT5C-  
224 GFP mice and WT littermates as a control were activated with a panel of agonists of TLR receptors,  
225 mainly pathogen-associated molecular pattern (PAMP) molecules, ligands of CD40 (T-cell-  
226 dependent signaling) and BCR (B cell receptor). Subsequent flow cytometry analyses of those cells  
227 performed in a time course experiment revealed a significant number of GFP and CD138-positive  
228 cells, similar to positive control, as a result of stimulation of selected TLR receptors, including  
229 TLR1/2 (Pam3CSK4), TLR2 (HKLM), TLR4 (LPS, *E. coli* K12), TLR6/2 (FSL1) and TLR9  
230 (ODN1826) (Figure 4). Stimulation of TLR3 (low and high molecular weight Poly(I:C)), TLR5  
231 (Flagellin *S.typhimurium*) and TLR8 (ssRNA40/LyoVec) showed a rather limited effect on TENT5C-  
232 GFP expression.

233 Subsequent analysis of the plasma cell subpopulations in CD138<sup>high</sup> (Q3 for WT; Figure 4A)  
234 and CD138<sup>high</sup>GFP<sup>pos</sup> (Q2 for TENT5C-GFP; Figure 4B) cell fractions using CD19 and CD45R  
235 markers showed a similar response to the treatment for cells isolated from both mouse lines. In turn,  
236 signaling provided by BCR stimulated with polyclonal F(ab')<sub>2</sub> goat anti-mouse IgM and CD40  
237 receptor with megaCD40L (trimeric variant) had limited effect on TENT5C expression, however,  
238 they induced the differentiation of plasma cells (Figure 4).

239 To assess whether antibody production is also impaired in TENT5C KO B cells activated via  
240 innate signaling pathways, we activated B cells from WT and KO with TLR agonists with the highest  
241 effect on TENT5C expression (TLR 1/2, TLR4, TLR6/2 and TLR9 agonists) in a time course, then  
242 collected cells and medium for western blot analysis at day 3 and 5. Indeed, we observed decreased  
243 secretion of both heavy IgG and light chains in KO, while  $\alpha$ -tubulin and GRP94 levels were  
244 unaffected (Supplementary Figure 5A, B).

245 All this together links B cell-intrinsic innate signaling via selected TLRs with the regulation  
246 of adaptive humoral immunity modulated by ncPAP TENT5C and reveals this enzyme as an  
247 important modulator of B cell response.

248

### 249 **TENT5C regulates B cell differentiation**

250 TENT5C KO leads to an increased B cell proliferation rate, suggesting that TENT5C may  
251 control the process of their differentiation into plasma cells (Mroczek et al., 2017). Since the terminal  
252 differentiation of B cells takes place in secondary lymphoid organs, we carried out extended  
253 phenotyping of B cells in the spleen as well as bone marrow. First, we observed that spleens in KO  
254 mice are about 20% enlarged compared to those isolated from WT (Figure 5A). The effect is specific  
255 since there is no difference in overall animal mass (Figure 5B). As this observation strongly suggested  
256 enhanced proliferation rates we have systematically examined B cell subpopulations from spleens  
257 and bone marrow of conventionally cohoused adult unimmunized littermates (12-16 weeks) using  
258 multicolor flow cytometry.

259 Interestingly, we observed that the number of CD138<sup>high</sup> cells in spleen and bone marrow was  
260 significantly increased in TENT5C KO mice (Figure 5C-D). Next, we carried out the quantitative  
261 determination of CD138<sup>high</sup> plasma cell subpopulations in WT and KO mice. This has revealed mature  
262 resting PCs as the only ones whose number is increased in TENT5C KO mice spleen and bone  
263 marrow while numbers of dividing plasmablasts and early PCs were slightly decreased or not changed  
264 in KO (Figure 5E). Interestingly, other B cell subpopulations in bone marrow (pre-proB, pro-B, pre-  
265 B, immature, early/late mature, transitional B) and splenic (transitional (T1/T2/T3), marginal zone  
266 (MZP & MZ), follicular (I & II)) were not affected by TENT5C KO (Supplementary Figure 6). All  
267 these observations clearly suggest that the lack of TENT5C enhances B cell proliferation and  
268 differentiation *in vivo* and confirms previous *in vitro* findings.

269 Next, we asked whether TENT5C shapes the secondary antibody repertoire generated by  
270 class-switch recombination (CSR), which replaces IgM with other isotypes during B cell  
271 differentiation into plasma cells, and whether it differs in the KO compared to the WT. The changes  
272 in the class profile of presented antibodies may indicate a disturbance in the CSR process. We  
273 observed that CD138<sup>high</sup> B cell subsets in TENT5C KO lose IgM expression much faster as compared

274 with WT which confirms their faster proliferation and accelerated selection of IgG1-expressing  
275 polyclonal plasma cells (Figure 6A, B, D, E). Our analysis also shows that in comparison to WT mice  
276 there are less IgA-positive plasmocytes in TENT5C KO mice, indicating problems with class switch  
277 recombination (CSR) in the KO mutant (Fig 6B, C, F). The general concentration of immunoglobulins  
278 is lowered in KO cells as a result of a diminished expression level and they accumulate membrane-  
279 bound IgG1 (Figure 6E). This is in agreement with the results we obtained for *in vitro* cultured B  
280 cells (Figure 2A, B).

## 281 282 **TENT5C is an ER-associated protein shaping for ER functionality**

283 The transition of B cells into immunoglobulin-secreting plasma cells requires a significant  
284 expansion of secretory organelles, given that ER-specific chaperones and folding enzymes facilitate  
285 the post-translational structural maturation of Igs. Since TENT5C modifies transcripts encoding Igs  
286 in responding B cells it may have a possible ER-related function. To examine the link between  
287 TENT5C activity and ER expansion during B cell responses, we performed a fractionation of  
288 activated B cells isolated from TENT5C-FLAG mice followed by western blot analysis. This revealed  
289 a significant fraction of the membrane-bound enzyme, which strongly suggests TENT5C ER-  
290 association (Figure 7A). This result was confirmed by a partial intracellular co-localization of  
291 endogenous TENT5C-GFP protein with the selectively stained endoplasmic reticulum (ER) in  
292 isolated CD138<sup>pos</sup> cells (Figure 7B). Finally, an ER-related function is supported by co-  
293 immunoprecipitation (Co-IP) experiments using high-affinity anti-GFP nanobodies followed by high-  
294 resolution mass spectrometry (MS) which revealed that TENT5C-GFP interacts with ribosomal  
295 proteins; thus it may directly polyadenylate immunoglobulin mRNAs at the rough ER (RER)  
296 (Supplementary Dataset 3).

297 As B lymphocyte maturation requires a significant increase in ER volume and TENT5C  
298 affects the rate of the differentiation process we compared its size and expansion dynamics during  
299 the activation of WT and KO B cells using specific ER-tracker dye labeling followed by flow  
300 cytometry analyses. The results of these experiments showed that a lack of TENT5C impairs the  
301 capacity of the secretory pathway through the reduction of ER volume (naïve and mature resting PC)  
302 (Figure 7C, D). Moreover, the dynamic of the ER expansion after activation is much slower in the  
303 TENT5C-deficient cells despite their accelerated differentiation into plasmocytes (Figure 7E).  
304 Reduced ER is consistent with a decreased level of both immunoglobulin encoding transcripts and  
305 the main chaperone Hspa5 (BIP), necessary for the correct functioning of the ER in TENT5C KO  
306 cells (Supplementary Dataset 2). Thus, our findings together with the fact that the overall level of  
307 antibody production in KO cells is reduced, strongly suggests that B cells isolated from TENT5C KO  
308 may have reduced ER stress levels. In order to analyze the ER-stress response, we treated activated



309 WT and KO B cells with the standard ER stress-inducing agent tunicamycin (Tu) and then analyzed  
310 unfolded protein response (UPR) markers with qPCR and western blots. Interestingly, induction of  
311 ER-stress enhances TENT5C expression (Figure 7F). Surprisingly, the initial ER stress level is  
312 enhanced in the mutant compared to WT however the KO cell response for Tu treatment was  
313 significantly diminished as shown by Xbp1 mRNA splicing and expression of selected markers IRE1,  
314 PERK, GRP94, CHOP, Ero1-LB, showing a general downregulation of unfolded protein response  
315 (Figure 7G-I).

316 Concluding, TENT5C dysfunction leads to a reduced ER volume and capacity of the ER stress  
317 response as a probable consequence of a decreased load of Ig.

318

## 319 Discussion

320 B cell development in mice and humans has been extensively studied, revealing complex  
321 physiological changes, driven by different signaling pathways, which influence the genome (somatic  
322 hypermutation, class-switch recombination), transcriptome (through the coordinated action of  
323 transcription factors) and proteome (ER reorganization, post-transcriptional gene expression  
324 regulation) in differentiating cells. In this study, we provide evidence for cytoplasmic  
325 polyadenylation, driven by TENT5C, being the previously undescribed mechanism involved in the  
326 regulation of immunoglobulin expression and B cell differentiation. Our data indicate that the role of  
327 cytoplasmic polyadenylation is broader than previously anticipated and provides a new layer to the  
328 regulation of immunoglobulin expression.

329 Recently, we presented the first experimental data for a new family of non-canonical  
330 cytoplasmic poly(A) polymerases TENT5 (formerly FAM46) (Warkocki et al., 2018). One of the  
331 members, TENT5C, was shown to be a specific growth suppressor in multiple myeloma cells  
332 (Mroczek et al., 2017; Zhu et al., 2017) and is the only TENT5 family member expressed at significant  
333 levels in B lymphocytes. In this work, using direct RNA sequencing by Oxford Nanopore  
334 Technologies, we identified immunoglobulin mRNAs as TENT5C specific targets in activated B  
335 cells. To our knowledge, this is also the first report showing a global view of poly(A) tails in B cells.  
336 Our approach offered high-quality, full-length mRNA sequences, including UTRs and poly(A) tails  
337 giving deeper insights into transcriptome shaping/regulation comparing to classical RNA-seq  
338 experiments. Comparing to the currently used RNA 3'-end research techniques such as TAIL-seq,  
339 PAL-seq, TED-seq, PAC-Seq or recently FLAM-seq (Chang et al., 2014; Harrison et al., 2015;  
340 Legnini I., 2018; Nicholson and Pasquinelli, 2018; Welch et al., 2015; Woo et al., 2018) it is  
341 characterized by a relative technical simplicity, and in contrast to other RNA-seq methods, no PCR-  
342 biases are introduced into libraries.



343 Despite the recent dynamic expansion of RNA 3'-terminome research, little was known how  
344 cytoplasmic ncPAP enzymes contribute to gene expression programs since such techniques were  
345 never applied for KO of individual enzymes in physiological conditions. Cytoplasmic adenylation  
346 was mostly studied in the context of gametogenesis or in other instances in which transcription is  
347 arrested or spatially and temporarily separated. Importantly, even a ~20% decrease of poly(A) tail  
348 length in TENT5C KO mice significantly diminishes a steady state concentration of immunoglobulins  
349 in the plasma or secreted by activated B cells cultured *in vitro*. This very strongly suggests that  
350 cytoplasmic polyadenylation is not restricted to deadenylated maternal mRNAs as in the case of  
351 gametogenesis. Since TENT5C is enriched at the ER and Igs are the main secreted proteins in B cells,  
352 we suggest that this may partially explain its specificity for immunoglobulins (Mroczek et al., 2017).  
353 However, as we were unable to identify any highly enriched sequence motif in TENT5C substrates,  
354 a more detailed analysis is needed to decipher the mechanism of its substrate specificity. Surprisingly,  
355 completely opposite to previous reports suggesting that highly expressed transcripts possess rather  
356 short poly(A) tails (Lima et al., 2017), we have shown that immunoglobulin transcripts, constituting  
357 the vast majority (up to 70%) of the PC transcriptome, have rather long poly(A) tails compared to  
358 other highly translated transcripts. It was previously shown that immunoglobulin regulation in a  
359 differentiation-dependent manner of membrane-associated or secreted IgM isoforms occurs by  
360 alternative polyadenylation at 3' pre-mRNA, which is initiated by the cleavage stimulation factor  
361 CstF-64. (Enders et al., 2014; Peng et al., 2017; Pioli et al., 2014; Takagaki and Manley, 1998).  
362 Additionally, the regulation of switching from mIgH to sIgH in plasma cells is mediated by PABPC1  
363 recruiting hnRNPLL to 3'-end of IgG transcripts in plasma cells making poly(A) tail a key mRNA  
364 feature for immunoglobulin production (Peng et al., 2017). Our finding confirms that adenylation is  
365 a key factor regulating immunoglobulin expression and for the first time provides evidence for  
366 cytoplasmic adenylation of immunoglobulin transcripts.

367 TENT5C was reported as one of the genetic signatures in ASC and a potential regulator of B  
368 cell differentiation and is one of the top 50 upregulated genes in spleen and bone marrow plasma cells  
369 (Shi et al., 2015). Our studies confirm a strong correlation of TENT5C expression with B cell  
370 proliferation and differentiation into plasma cells. Moreover, it is positively correlated with the  
371 upregulation of PABPC1 previously identified as TENT5C interactor in MM cells (Mroczek et al.,  
372 2017). Signaling from both surface (TLR1, 2, 4, 6) and intracellular (TLR9) TLR receptors strongly  
373 upregulate TENT5C levels thus promote the B cell lineage differentiation and enhance immune  
374 response, however detailed dissection of TLR downstream signaling pathways require further  
375 investigation (Pasare and Medzhitov, 2005). Interestingly mice devoid of MyD88 (myeloid  
376 differentiation primary response gene 88) gene, which is one of the key elements of TLR signalling,  
377 reveal similar phenotypes to TENT5C deletion including: decreased steady-state levels of total serum

378 immunoglobulins, decreased antigen-specific IgM and IgG1 antibody responses and abolished IgG2  
379 antibody response in immunized mice (Kang et al., 2011). This strongly suggests that TENT5C is  
380 one of the TLR signaling effectors in B cells. In agreement, TENT5C upregulation by specific B cell  
381 innate signaling is underlined by the fact that it is not affected by the stimulation of BCR and CD40  
382 receptor (T cell-dependent).

383 The transition of naïve B cells into ASC requires significant ER membrane expansion, given  
384 that the structural maturation of immunoglobulins is facilitated by ER-residing chaperones and  
385 folding machinery (Braakman and Hebert, 2013; Kirk et al., 2010; Liu and Li, 2008; Wiest et al.,  
386 1990). The increase in the volume of secretory organelles occurs through the generation of ER sheets  
387 and requires UPR signaling (Schuck et al., 2009). B cells activate all three branches of the UPR  
388 response including specific stress sensors: inositol-requiring enzyme-1 $\alpha$  (IRE1 $\alpha$ ), protein kinase R  
389 (PKR)-like endoplasmic reticulum kinase (PERK) and activating transcription factor 6 $\alpha$  (ATF6 $\alpha$ ). It  
390 has been shown that Xbp1 and Blimp-1 transcription factors are required for plasma-cell development  
391 and they link B cell physiology with UPR response (Gass et al., 2004; Reimold et al., 2001; Tellier  
392 et al., 2016). Additionally, a functional analysis of ASC signature genes identified 30% of the  
393 transcriptome as related to UPR (Shi et al., 2015). Thus, downregulation of immunoglobulin  
394 expression by TENT5C has to impair the unfolded protein response (UPR), which plays a pivotal role  
395 in the differentiation of ASC. In agreement with this, basic ER stress in naïve B cells from TENT5C  
396 KO mice is enhanced which reflects their faster proliferation and differentiation into PC while ER  
397 expansion dynamics is reduced. This also shows that cytoplasmic adenylation by TENT5C, being the  
398 posttranscriptional regulator of immunoglobulin expression, may have a profound effect on different  
399 aspects of B cell physiology, pointing at its, previously missed, important role not only in cell  
400 homeostasis but even its organismal-level one.

401 In conclusion, this study identified ncPAP TENT5C as a new factor involved in the regulation  
402 of immunoglobulin production through ER-associated polyadenylation in responding B cell lineage  
403 in mice. Thus, we demonstrate the significance of cytoplasmic poly(A) tail homeostasis as an  
404 important regulatory level for B cell immune response.

#### 405 **Acknowledgments**

406 We would like to thank Dominika Nowis for critical reading of the manuscript, Aleksander  
407 Chlebowski for microscopy assistance, Dominik Cysewski for high resolution mass spectrometry  
408 analyses, Janina Durys for the editing of the manuscript, Marcin Szpila for assistance in coordination  
409 of animal house work and Andrzej Dziembowski laboratory members for stimulating discussions.  
410 The equipment from [www.ibb.waw.pl/en/services/mass-spectrometry-lab](http://www.ibb.waw.pl/en/services/mass-spectrometry-lab) was sponsored in part by

411 the Centre for Preclinical Research and Technology (CePT), a project co-sponsored by European  
412 Regional Development Fund and Innovative Economy, The National Cohesion Strategy of Poland.

413

#### 414 **Funding**

415 This work was funded by ERC Starting Grant 309419 PAPs & PUPs (to AD); NCN OPUS14,  
416 UMO-2017/27/B/NZ2/01234 (to SM) and cosupported by NCN Harmonia10 UMO-  
417 2013/10/M/NZ4/00299 (to AD).

418

#### 419 **Author Contributions**

420 SM and AD developed and directed the studies, AB and SM carried out majority of the  
421 biochemical and cell line experiments, MKK performed all flow cytometry analyses, PSK performed  
422 all bioinformatics analyses, OG participated in localization studies and coordinated work of the  
423 animal house, BT performed tissue immunostaining, KK purified the EIF4E protein, JG prepared  
424 CRISPR reagents and genotyped mice, EB generated transgenic animals. SM and AD wrote the  
425 manuscript with a contribution of PSK, AB, OG and MKK.

426

#### 427 **STAR★Methods**

#### 428 Key Resources Table

| REAGENT or RESOURCE                                 | SOURCE                   | IDENTIFIER                         |
|-----------------------------------------------------|--------------------------|------------------------------------|
| Antibodies for WB and FACS                          |                          |                                    |
| Rabbit monoclonal anti-Irf1                         | CST                      | Cat# 3294<br>RRID:AB_823545        |
| Rabbit monoclonal anti-ATF6                         | CST                      | Cat# 65880<br>RRID:AB_2799696      |
| Rabbit monoclonal anti-PERK                         | CST                      | Cat# 3192<br>RRID:AB_2095847       |
| Mouse monoclonal anti-alpha-tubulin                 | Millipore                | Cat# MABT205<br>RRID:AB_11213030   |
| Rabbit monoclonal anti-Xbp1                         | Abcam                    | Cat# ab220783                      |
| Rabbit polyclonal anti-DYKDDDDK (FLAG)              | Thermo Fisher Scientific | Cat# PA1-984B<br>RRID:AB_347227    |
| F(ab') <sub>2</sub> -Goat anti-Mouse IgM (Mu chain) | Thermo Fisher Scientific | Cat# 16-5092-85<br>RRID:AB_2573088 |
| Mouse monoclonal anti-IL6                           | SCBT                     | Cat# sc-57315<br>RRID:AB_2127596   |
| m-IgGλ BP-HRP                                       | SCBT                     | Cat# sc-516132                     |
| m-IgGκ BP-HRP                                       | SCBT                     | Cat# sc-516102<br>RRID:AB_2687626  |
| Rabbit polyclonal anti-GRP94                        | SCBT                     | Cat# sc-11402<br>RRID:AB_2119050   |
| BUV395 Rat monoclonal anti-CD19                     | BD Biosciences           | Cat# 563557<br>RRID:AB_2722495     |
| AF700 Rat monoclonal anti-CD19                      | BD Biosciences           | Cat# 557958<br>RRID:AB_396958      |

|                                                      |                          |                                   |
|------------------------------------------------------|--------------------------|-----------------------------------|
| BV421 Rat monoclonal anti-CD43                       | BD Biosciences           | Cat# 562958<br>RRID:AB_2665409    |
| BV421 Rat monoclonal anti-CD23                       | BD Biosciences           | Cat# 562929<br>RRID:AB_2737898    |
| FITC Rat monoclonal anti-IgM                         | BD Biosciences           | Cat# 553437<br>RRID:AB_394857     |
| PE Mouse monoclonal anti-CD249 (Ly-51)               | BD Biosciences           | Cat# 553735<br>RRID:AB_395018     |
| PE Rat monoclonal anti-CD93 (Early B Lineage)        | BD Biosciences           | Cat# 558039<br>RRID:AB_397003     |
| PE Rat monoclonal anti-IgA                           | Thermo Fisher Scientific | Cat# 12-5994-81<br>RRID:AB_466115 |
| PE Rat monoclonal anti-CD138                         | BD Biosciences           | Cat# 553714<br>RRID:AB_395000     |
| BV605 Rat monoclonal anti-CD138                      | BD Biosciences           | Cat# 563147<br>RRID:AB_2721029    |
| BV605 Rat monoclonal anti-IgD                        | BD Biosciences           | Cat# 563003<br>RRID:AB_2737944    |
| AF647 Goat monoclonal anti-IgG1                      | Thermo Fisher Scientific | Cat# A-21240<br>RRID:AB_2535809   |
| APC Rat monoclonal anti-CD45R/B220                   | BD Biosciences           | Cat# 553092<br>RRID:AB_398531     |
| PerCPCy5.5 Rat monoclonal anti- CD45R/B220           | BD Biosciences           | Cat# 552771<br>RRID:AB_394457     |
| PerCPCy5.5 Rat monoclonal anti-CD24                  | BD Biosciences           | Cat# 562360<br>RRID:AB_11151895   |
| PerCPCy5.5 Rat monoclonal anti-CD21/CD35             | BD Biosciences           | Cat# 562797<br>RRID:AB_2737802    |
| Chicken polyclonal anti-GFP                          | Abcam                    | Cat# ab13970<br>RRID:AB_300798    |
|                                                      |                          |                                   |
| <b>Chemicals, Peptides, and Recombinant Proteins</b> |                          |                                   |
| Phusion HF polymerase                                | Thermo Fisher Scientific | Cat# F530                         |
| TRI Reagent                                          | Sigma-Aldrich            | Cat# T9424                        |
| Gluthatione-Sepharose 4B resign                      | GE Healthcare            | Cat# 17-0756-01                   |
| Resource S resign                                    | GE Healthcare            | Cat# 17-1180-01                   |
| GFP-Trap                                             | Chromotek                | Cat# gtm-100                      |
| ssRNA40/LyoVec (TLR7 ligand)                         | Invivogen                | Cat# tlr-lrna40                   |
| Poly(I:C)-LMW (TLR3 ligand)                          | Invivogen                | Cat# tlr-picw                     |
| Poly(I:C)-HMW (TLR3 ligand)                          | Invivogen                | Cat# tlr-pic                      |
| Pam3CSK4 (TLR2-TLR1 ligand)                          | Invivogen                | Cat# tlr-pms                      |
| ODN 1826 (TLR9 ligand)                               | Invivogen                | Cat# tlr-1826                     |
| LPS-EK (from <i>E. coli</i> K12 strain- TLR4 ligand) | Invivogen                | Cat# tlr-pekllps                  |
| HKLM (TLR2 ligand)                                   | Invivogen                | Cat# tlr-hklm                     |
| FSL-1 (TLR2/TLR6 ligand)                             | Invivogen                | Cat# tlr-fsl                      |
| FLA-ST (TLR5 ligand)                                 | Invivogen                | Cat# tlr-epstfla                  |
| LPS                                                  | SCBT                     | Cat# sc-3535                      |
| IL4                                                  | Peptrotech               | Cat# 214-14                       |
| megaCD40L                                            | Enzo                     | Cat# ALX-522-120-C010             |
| RiboLock RNase Inhibitor                             | Invitrogen               | Cat# EO0381                       |
| Agencourt AMPure XP magnetic beads                   | Beckman Coulter          | Cat# A63880                       |
| TURBO DNA-free Kit                                   | Thermo Fisher Scientific | Cat# AM1907                       |
| T4 DNA Ligase                                        | NEB                      | Cat# M0202                        |
| SuperScript III Reverse Transcriptase                | Invitrogen               | Cat# 18080085                     |
| Viscolase                                            | A&A Biotechnology        | Cat# 1010-100                     |

|                                                                                               |                                                                                                                                                                       |                                   |
|-----------------------------------------------------------------------------------------------|-----------------------------------------------------------------------------------------------------------------------------------------------------------------------|-----------------------------------|
| PerfectHyb Plus hybridization buffer                                                          | Sigma                                                                                                                                                                 | Cat# H7033                        |
| DECAprime II DNA Labeling Kit                                                                 | Thermo Fisher Scientific                                                                                                                                              | Cat# AM1455                       |
| <b>Critical Commercial Assays</b>                                                             |                                                                                                                                                                       |                                   |
| Ribo-Zero Gold rRNA-removal kit H/R/M                                                         | Illumina                                                                                                                                                              | Cat# RZG1224                      |
| ERCC RNA Spike-In Mix                                                                         | Thermo Fisher Scientific                                                                                                                                              | Cat# 4456740                      |
| KAPA Stranded RNA-Seq Library Preparation Kit for Illumina platforms                          | KAPA Biosystems                                                                                                                                                       | Cat# KK8401                       |
| Platinum SYBR Green qPCR SuperMix-UDG                                                         | Thermo Fisher Scientific                                                                                                                                              | Cat# 11733046                     |
| Nanopore RNA-direct sequencing kit                                                            | Oxford Nanopore Technologies                                                                                                                                          | Cat# SQK-RNA001                   |
| LIVE/DEAD Fixable Near-IR Dead Cell Stain Kit                                                 | Thermo Fisher Scientific                                                                                                                                              | Cat# L34976                       |
| LIVE/DEAD Fixable Violet Dead Cell Stain Kit                                                  | Thermo Fisher Scientific                                                                                                                                              | Cat# L34964                       |
| ER-Tracker Red (BODIPY TR Glibenclamide)                                                      | Thermo Fisher Scientific                                                                                                                                              | Cat# E34250                       |
| Purified rat anti-Mouse CD16/32 (Mouse BD Fc block)                                           | BD Biosciences                                                                                                                                                        | Cat# 553142                       |
| BD Cytotfix/Cytoperm                                                                          | BD Biosciences                                                                                                                                                        | Cat# 554714                       |
| Brilliant Stain Buffer                                                                        | BD Biosciences                                                                                                                                                        | Cat# 566349                       |
| ER Staining Kit                                                                               | Abcam                                                                                                                                                                 | Cat# ab139482                     |
| EasySep Mouse B Cell Isolation Kit                                                            | Stemcell                                                                                                                                                              | Cat# 19854                        |
| EasySep Mouse CD138 Positive Selection Kit                                                    | Stemcell                                                                                                                                                              | Cat# 18957                        |
| <b>Deposited Data</b>                                                                         |                                                                                                                                                                       |                                   |
| Nanopore RNA sequencing data                                                                  | This study                                                                                                                                                            | Accession number: PRJEB33089      |
| Illumina RNA sequencing data                                                                  | This study                                                                                                                                                            | GEO accession number: GSE132883   |
| <b>Experimental Models: Organisms/Strains/Cell lines</b>                                      |                                                                                                                                                                       |                                   |
| Mouse, B6CBAF1;B6-TENT5C <sup>KO</sup> /Tar<br>All experiments were performed on littermates. | <a href="http://www.crispr mice.eu">www.crispr mice.eu</a><br>(Mroczek et al., 2017)                                                                                  | N/A                               |
| Mouse, B6CBAF1;B6-TENT5C <sup>FLAG/FLAG</sup> /Tar                                            | <a href="http://www.crispr mice.eu">www.crispr mice.eu</a><br>(Mroczek et al., 2017)                                                                                  | N/A                               |
| Mouse, B6CBAF1;B6-TENT5C <sup>GFP/GFP</sup> /Tar                                              | This study;<br><a href="http://www.crispr mice.eu">www.crispr mice.eu</a>                                                                                             | N/A                               |
| HEK293T                                                                                       | ATCC                                                                                                                                                                  | Cat# CRL-3216,<br>RRID: CVCL_0063 |
| <b>Oligonucleotides are listed in separate supplementary file</b>                             |                                                                                                                                                                       |                                   |
| See Tables 1 and 2 for the list of primers                                                    |                                                                                                                                                                       |                                   |
| <b>Software and Algorithms</b>                                                                |                                                                                                                                                                       |                                   |
| Prism 6 for Windows                                                                           | GraphPad Prism                                                                                                                                                        | RRID: SCR_002798                  |
| FlowJo v10                                                                                    | FlowJo, LLC                                                                                                                                                           | v10,RRID: SCR_008520              |
| MultiGauge 5.1                                                                                | FujiFilm<br>(discontinued)                                                                                                                                            | RRID:SCR_014299                   |
| ImageJ                                                                                        | <a href="https://imagej.nih.gov/ij/">https://imagej.nih.gov/ij/</a>                                                                                                   | RRID:SCR_003070                   |
| R Project for Statistical Computing (v. 3.5.0)                                                | R Foundation for Statistical Computing, Vienna, Austria                                                                                                               | RRID:SCR_001905                   |
| Cutadapt (v. 1.18)                                                                            | (Martin, 2011)<br><a href="http://journal.embnet.org/index.php/embnetjournal/article/view/200">http://journal.embnet.org/index.php/embnetjournal/article/view/200</a> | RRID:SCR_011841                   |

|                                     |                                                                                                                                        |                 |
|-------------------------------------|----------------------------------------------------------------------------------------------------------------------------------------|-----------------|
| Subread                             | (Liao et al., 2014)<br><a href="http://subread.sourceforge.net/">http://subread.sourceforge.net/</a>                                   | RRID:SCR_009803 |
| Guppy 2.2.2                         | Oxford Nanopore Technologies                                                                                                           |                 |
| spliced_bam2gff (from pinfish)      | <a href="https://github.com/nanoporetech/pinfish">https://github.com/nanoporetech/pinfish</a>                                          |                 |
| GFFCompare (v. 0.10.6)              | <a href="https://ccb.jhu.edu/software/stringtie/gffcompare.shtml">https://ccb.jhu.edu/software/stringtie/gffcompare.shtml</a>          |                 |
| FLAIR v1.2                          | (Workman et al., 2018)<br><a href="https://github.com/BrooksLabUCSC/flair">https://github.com/BrooksLabUCSC/flair</a>                  |                 |
| DESeq2 (v. 1.22)                    | (Love et al., 2014)                                                                                                                    | RRID:SCR_015687 |
| STAR split read aligner (v. 2.6.1a) | (Dobin et al., 2013)<br><a href="https://github.com/alexdobin/STAR">https://github.com/alexdobin/STAR</a>                              | RRID:SCR_015899 |
| Minimap 2.14                        | (Li, 2018)<br><a href="https://github.com/lh3/minimap2">https://github.com/lh3/minimap2</a>                                            |                 |
| Nanopolish 0.10.2                   | (Workman et al., 2018)<br><a href="https://github.com/jts/nanopolish">https://github.com/jts/nanopolish</a>                            | RRID:SCR_016157 |
| NanoTail R                          | This study;<br>DOI:<br>10.5281/zenodo.3227971<br><a href="https://github.com/smaegol/nanotail">https://github.com/smaegol/nanotail</a> | N/A             |
| <b>Other</b>                        |                                                                                                                                        |                 |
| BD LSRFortessa                      | BD Biosciences                                                                                                                         | N/A             |

429

430

431

432

433

434

435

436

437

438

439

440

441

442

443



444 **STAR★Methods**

445 **LEAD CONTACT AND MATERIALS AVAILABILITY**

446 Further information and requests for resources and reagents should be directed to and will be  
447 fulfilled by the Lead Contact, Andrzej Dziembowski ([andrzejd@ibb.waw.pl](mailto:andrzejd@ibb.waw.pl)).

448

449 **EXPERIMENTAL MODEL AND SUBJECT DETAILS**

450 ***Mice***

451 Mice were bred in conventional conditions at the Animal House at the Faculty of Biology, the  
452 University of Warsaw under 12h light/dark cycle at an ambient temperature of 22°C. Health  
453 monitoring was performed regularly at the IDEXX laboratory (reports are shown in Supplementary  
454 Table 3). Experimental mice originated from heterozygotic matings and as a result were cohoused  
455 littermates. All mice were sacrificed at age 12-16 weeks.

456 The mice used in this study were naive and had no previous history of experimentation or exposure  
457 to drugs. The TENT5C KO and TENT5C-FLAG mice strains were described previously (Mroczek et  
458 al., 2017). The TENT5C C-terminal-GFP *knock-in* animals were generated by the Mouse Genome  
459 Engineering Facility at the Institute of Biochemistry and Biophysics, Polish Academy of Sciences  
460 (<https://crisprmice.eu/>).

461 All procedures were approved by the I Local Ethical Committee in Warsaw.

462

463 **METHOD DETAILS**

464

465 ***Generation of TENT5C C-terminal GFP Knock-in Mice***

466 The TENT5C C-terminal-GFP *knock-in* mice line was generated using sgRNA (chimeric  
467 single-guide RNA) designed as close as possible to the STOP codon of TENT5C gene. The sgRNA  
468 was synthesized using T7 RNA polymerase and DNA template obtained with  
469 mTENT5C\_GFP\_sgRNA\_F and Universal\_gRNA\_rev primers (underlined is T7 RNA polymerase  
470 promoter). All subsequent steps were performed as described previously (Mroczek et al., 2017). The  
471 dsDNA donor for in-frame C-terminal TEV-GFP *knock-in*, two 1kb homology arms flanking  
472 TENT5C STOP codon were amplified from C57BL/6J gDNA using mTent5C\_TOPO-  
473 LF\_1f/mTent5C\_LF-TEV\_1r and mTent5C\_eGFP-RF\_1f/mTent5C\_RF-TOPO\_1r primer pairs.  
474 TEV-eGFP coding sequence was amplified from pKK-TEV-eGFP (Szczesny et al., 2018) plasmid  
475 using TEV\_1F and mCherry\_GFP\_1R primers.

476 Assembly of TEV-eGFP, 1kb homology arms and TOPO Zero Blunt (Thermo Fisher Scientific)  
477 cloning vector was performed with SLIC method and final pTOPO/F46C/TEV-eGFP construct was

478 verified by sequencing. (Li and Elledge, 2012). Next, we amplified 865bp fragment of TENT5C-  
479 TEV-eGFP donor flanked with 60bp homology arms from pTOPO/F46C/TEV-eGFP and mTent5C-  
480 GFP\_short\_1F/ mTent5C-GFP-short\_1R primers. PCR product was purified with AmpureXP beads  
481 (Beckman-Coulter) and stored at -20°C. Mice genotyping were carried out in PCR reaction using  
482 mTent5C\_GFP\_seqF and mTent5C\_GFP\_seqR primers and Phusion HotStart II Polymerase  
483 (Thermo) and gDNA isolated from of mice ears or tails fragments with HotShot method (Alasaad et  
484 al., 2008) or with Genomic Mini DNA isolation kit (A&A Biotechnology). The sequencing results  
485 were analyzed with Mutation Surveyor 4.0 (SoftGenetics). All primes used for mice generation are  
486 listed in Supplementary Table 1.

487

### 488 ***Tissue collection and blood analysis***

489 Blood samples were collected terminally from the mandibular vein to EDTA or serum separator tubes.  
490 Complete blood count, gel electrophoresis of proteins and serum iron level analysis were performed  
491 at the Veterinary Diagnostic Laboratory LabWet in Warsaw (<http://www.labwet.pl/>) on the day of  
492 blood collection. For SPEP analyses were performed using SAS-MX SP-10 Kit (Helena-  
493 Biosciences). Serum samples were diluted in the buffer in a ratio of 1 to 4 and proteins were separated  
494 at a constant voltage of 80V through 25 min. Gels were quantified with Platinum software (Helena-  
495 Biosciences).

496 All mice were sacrificed by cervical dislocation. Spleen and femur and tibia bones were isolated  
497 immediately. Bone marrow was isolated using centrifugation method (Amend et al., 2016). BM was  
498 depleted of red blood cells using ACK lysis buffer (154.95 mM ammonium chloride, 10 mM  
499 potassium bicarbonate, 0.1 mM EDTA).

### 500 ***Primary cell culture and ex vivo B cell activation***

501 Single cell suspension of splenocytes was obtained by mechanical tissue disintegration of the spleen  
502 through a 70  $\mu$ m cell strainer. Then, splenocytes were additionally depleted from red blood cells using  
503 ACK lysis buffer before separation. Naïve B cells were isolated from spleen using immunomagnetic  
504 negative selection with EasySep™ Mouse B Cell Isolation Kit (Stemcell; 19854) and CD138<sup>high</sup> cells  
505 were isolated from spleen and bone marrow with EasySep Mouse CD138 Positive Selection Kit  
506 (Stemcell; 18957) according to the manufacturer's instructions.

507 Primary cells were cultured in RPMI 1640 ATCC's modified (Invitrogen) supplemented with 15%  
508 FBS (Invitrogen), 100 nM 2-mercaptoethanol (Sigma), penicillin/streptomycin (Sigma) and  
509 activators or mitogens depending on the experiment: 20 ng/ml IL-4 (Peprotech), 0.5  $\mu$ g/ml  
510 megaCD40L (Enzo), 10  $\mu$ g/ml anti-IgM (Invitrogen), 20  $\mu$ g/ml LPS (Santa Cruz), 1  $\mu$ g/ml

511 Pam3CSK4 (Invivogen),  $10^8$  cells/ml HKLM (Invivogen), 10  $\mu$ g/ml Poly(I:C), HMW and LMW  
512 (Invivogen), 10  $\mu$ g/ml LPS-EK standard (Invivogen), 1  $\mu$ g/ml FLA-ST (Invivogen), 100 ng/ml FSL1  
513 (Invivogen), 1  $\mu$ g/ml ssRNA40/LyoVec (Invivogen), 1  $\mu$ M ODN1826 (Invivogen).

#### 514 ***Spleen histology and plasma cell microscopy***

515 For the histology of the spleen, animals were overdosed with ketamine/xylazine and perfused  
516 transcardially at 10 ml/min flow rate with PBS for 1min following 4% PFA in phosphate buffer (PB)  
517 for 2min at room temperature. Organs were dissected, post-fixed in PFA for 2hr at room temperature  
518 and suffused with 30% sucrose solution in PB overnight at 4°C. For immunohistochemically staining  
519 10  $\mu$ m-thick sections were cut with the cryostat, endogenous peroxidase was quenched with 3% H<sub>2</sub>O<sub>2</sub>  
520 in TBS and sections were blocked 2 hrs with 10% rabbit serum and 1% BSA in TBS with 0.3% Triton  
521 X-100. Sections were incubated with primary antibodies anti-GFP from chicken (ab13970, Abcam,  
522 Cambridge, UK) and anti-CD138-PE from rat (BD Pharmingen, San Jose, CA, US) diluted 1000x  
523 and 500x, respectively, in blocking solution and developed with goat anti-chicken-Alexa-488 with  
524 Hoechst diluted in blocking solution. After quenching and incubation with antibodies sections were  
525 washed with TBS with Triton-X100 0.025% 3x 5min.

526 Isolated CD138<sup>high</sup> cells were stained using ER Staining Kit (ab139482) according to the  
527 manufacturer's instruction with following exceptions: Red Detection Reagent was diluted 2000x,  
528 Hoechst 33342 Nuclear Stain was diluted 500x and the staining time was shortened to 4 minutes.

529 The plasma cells and spleen section imaging was performed using a confocal system (Fluoview  
530 FV1000) equipped with a spectral detector (Olympus) and with 60x oil objective with 1.40 aperture.  
531 Images were processed using ImageJ software.

532

#### 533 ***GST-eIF4E<sup>K119A</sup> purification***

534 Chemocompetent *Escherichia coli* BL21-CodonPlus-RIL strain (Stratagene) was transformed with  
535 plasmid pGEX-4T-3 carrying GST-eIF4EK119A. Cells were pre-incubated in standard Luria-Broth  
536 (LB) medium (with 0.1 mg/ml ampicillin and 34 mg/ml chloramphenicol) overnight and then  
537 transferred to Auto Induction Media Super Broth Base Including Trace Elements (Formedium)  
538 supplemented with 2% glycerol, kanamycin (50 mg/ml) and chloramphenicol (34 mg/ml) and  
539 incubated for 48h in 18°C with shaking 150 rpm. Bacteria were pelleted by centrifugation at 4500  
540 rpm for 15 minutes at 4°C, frozen in liquid nitrogen and stored at -20°C. Pellet from 4 liters of culture  
541 was used for single purification. Pellet was resuspended in column buffer (50mM N<sub>2</sub>HPO<sub>4</sub> pH 7.5,  
542 150mM NaCl, 1mM EDTA) supplemented with 1 mM DTT, 1% Triton X-100, 1mM PMSF, a protein  
543 inhibitor cocktail (20 nM pepstatin; 6 nM leupeptin; 2 ng/ml chymostatin) and 50  $\mu$ g/ml lysozyme,

544 incubated for 20 minutes in 4 °C, then broken in a French pressure cell press Multisiflex-C3 at 500  
545 Bar. The homogenate was centrifuged in a Sorvall WX ULTRA SERIES ultracentrifuge, F37L rotor  
546 at 32000 rpm for 45 minutes at 4°C. The supernatant was loaded on 1 ml column with Glutathione  
547 Sepharose 4B resin, equilibrated by column buffer. ÄKTA Purifier system (GE Healthcare) was used  
548 for all purification steps. Unbound proteins were washed out with 20 CV of column buffer. GST-  
549 eIF4e was collected during 5 CV washing of elution buffer (50mM Na<sub>2</sub>HPO<sub>4</sub> pH 8.5, 10mM L-  
550 Glutathione reduced, 1mM DTT). The elution fraction was mixed and diluted 3 times with water and  
551 loaded into Ion-exchange column (Resource S GE Healthcare), equilibrated by 50mM Na<sub>2</sub>HPO<sub>4</sub>  
552 pH=8, 100 mM NaCl. GST-eIF4e was eluted by 0.1-1M NaCl gradient. All purification steps were  
553 analyzed by SDS-PAGE.

#### 554 ***RNA isolation***

555 Total RNA was isolated from cells with TRIzol reagent (Thermo Fisher Scientific) according to the  
556 manufacturer's instructions, dissolved in nuclease-free water and stored at -20°C.

557

#### 558 ***RT-qPCR***

559 For the quantitative analysis, RNA was first treated with DNase (Thermo Fisher Scientific) for 30  
560 min in 37°C and then reverse transcribed using SuperScript III (Thermo Fisher Scientific) and  
561 oligo(dT)<sub>20</sub> and random-primers (Thermo Fisher Scientific). The quantitative PCR was performed  
562 with Platinum SYBR Green qPCR SuperMix-UDG (Thermo Fisher Scientific) using LightCycler 480  
563 II (Roche) PCR device and appropriate primers listed in Supplementary Table 2. Gene expression for  
564 each sample was normalized to GAPDH. Differences were determined using the 2<sup>-ΔΔC(t)</sup> calculation.

#### 565 ***Northern Blotting***

566 Northern blotting was performed as previously described (Mroczek et al., 2017). RNA samples were  
567 separated on 4% acrylamide gels containing 7M urea in 0.5x TBE buffer and transferred to a Hybond  
568 N+ membrane by electrotransfer in 0.5x TBE buffer. After transfer membranes, blots were stained  
569 with 0.03% methylene blue in 0.3 M NaAc pH 5.3 for 5 minutes at room temperature, scanned and  
570 then destained with water. RNA was immobilized on membranes by 254 nm UV light using a UVP  
571 CL-1000 crosslinker. Radioactive probes were labeled with a <sup>32</sup>P (dATP) with a DECAprime II DNA  
572 Labeling Kit (Thermo Fisher Scientific). To obtain templates for probes labeling PCR on cDNA from  
573 B cells activated with LPS and IL4 for 7 days was conducted using primers listed in Supplementary  
574 Table 2.

575 Membranes were pre-hybridized in PerfectHyb Plus Hybridization Buffer (Sigma) for 1 hour 65°C  
576 and incubated with radioactive probes in PerfectHyb Plus Hybridization Buffer overnight 65°C. Then  
577 membranes were washed in 2xSSC with 0.1% SDS for 20 min, 0.5xSSC with 0.1% SDS for 20 min

578 and 20min 0.1xSSC with 0.1% SDS for 20 min, scanned with Fuji Typhoon FLA 7000 (GE  
579 Healthcare Life Sciences) and analyzed with Multi Gauge software Ver. 2.0 (FUJI FILM).

580

#### 581 ***mRNA enrichment with GST-eIF4E<sup>K119A</sup> protein***

582 Purification was performed as described previously with some modifications (Bajak and Hagedorn,  
583 2008). Briefly, Glutathione-Sepharose 4B resin (GE Healthcare,) was incubated with GST-  
584 eIF4EK119A protein in sterile PBS (200 µl resin per 200 µg protein) for 1 hour at room temperature  
585 with rotation. Then the resin was washed 2 times with PBS and 3 times with buffer B (10 mM  
586 potassium phosphate buffer, pH 8.0, 100 mM KCl, 2 mM EDTA, 5% glycerol (Sigma), 0.005%  
587 Triton X-100 (Sigma), 6 mM DTT (A&A Biotechnology), and 20 U/mL Ribolock RNase Inhibitor  
588 (Thermo Scientific). 100 µg of total RNA, previously denatured during 10 min in 70°C, was mixed  
589 with the prepared resin and incubated for 1 h at room temperature on an immunoprecipitation rotor.  
590 Then, the resin was washed 3 times with buffer B, 2 times with buffer B supplemented with 0.5 mM  
591 GDP (Sigma) and 2 times with buffer B without GDP. RNA was eluted from the resin by acid  
592 phenol:chloroform extraction and precipitated using 100% ethanol (Merck), 3M sodium acetate and  
593 GlycoBlue coprecipitant (Invitrogen).

#### 594 ***Validation of the mRNA enrichment procedure with GST-eIF4E<sup>K119A</sup> protein***

595 150 µg of total RNA from HEK293T cells were subjected to mRNA enrichment with GST-eIF4E<sup>K119A</sup>  
596 protein as described above. Then, both total and purified RNA were treated with DNase (Thermo  
597 Fisher Scientific) and 300 ng was used for reverse transcription (as described above). To estimate  
598 mRNA enrichment and rRNA removal efficiency cDNA was used for qPCR analysis, as described  
599 above.

#### 600 ***RNAseq***

601 All experiments were done in triplicate, where single replicate originated from TENT5C KO and WT  
602 littermates at age 12-15 weeks.

#### 603 ***Cell culture and RNA retrieval***

604 Naïve B cells were isolated and cultured as described above. Subsequently, after isolation cells were  
605 activated by the addition of 20 ng/ml IL-4 (Peprotech) and 20 µg/ml LPS (Santa Cruz) to the medium,  
606 followed by 7 days of incubation. Finally, RNA was isolated as described above.

#### 607 ***Library preparation***

608 Total RNA was treated with DNase (Invitrogen) for 30 min in 37°C and 1 µg of RNA was subjected  
609 to ribodepletion using a Ribo-Zero Kit (Illumina), according to the manufacturer's recommendations

610 and spiked-in with external RNA (ERCC RNA Spike-In Mix, Thermo Fisher Scientific). Strand-  
611 specific libraries were prepared using a dUTP protocol (KAPA Stranded RNA-Seq Library  
612 Preparation Kit), according to the manufacturer. Library quality was assessed using chip  
613 electrophoresis performed on an Agilent 2100 Bioanalyzer (Agilent Technologies, Inc.). The libraries  
614 were sequenced using an Illumina NextSeq500 sequencing platform to an average number of  $\sim 1.5 \times$   
615  $10^7$  reads per library in the 75-nt paired-end mode.

616

### 617 *Nanopore Direct RNA sequencing and polyadenylation analysis*

#### 618 *RNA retrieval*

619 Direct RNA sequencing was performed in duplicate, using the same input RNA (batches 1 and 2) as  
620 for the RNAseq experiment (described above). 100  $\mu\text{g}$  of RNA was subjected to mRNA-enrichment  
621 with GST-eIF4E<sup>K119A</sup> protein (as described above), followed by the ribodepletion of 2.5  $\mu\text{g}$  RNA  
622 using a Ribo-Zero Kit (Illumina), according to the manufacturer's recommendations.

#### 623 *Library preparation and sequencing*

624 Nanopore direct RNA libraries were prepared from 500 ng of cap-enriched, rRNA-depleted mRNA  
625 with Direct RNA Sequencing Kit (ONT, SQK-RNA001). Instead of RNA CS, a 0.5  $\mu\text{l}$  ERCC spike-  
626 in was added during RTA adapter ligation step and all remaining steps were performed according to  
627 the manufacturer's instructions. Sequencing was performed with MinION device and Flow Cell (Type  
628 R9.4.1; RevC) and basecalled using Guppy 2.2.2 (Oxford Nanopore Technologies).

629

### 630 *Co-Immunoprecipitation and Mass spectrometry analysis*

631 Activated with LPS (20  $\mu\text{g}/\text{ml}$ ) and IL4 (20 ng/ml) TENT5C-GFP B cells were crosslinked  
632 with 1 mM DSP (dithiobis(succinimidyl propionate); Invitrogen) for 1 h before stopping the reaction  
633 with 50 mM Tris pH 8.0. After washing with PBS-supplemented 50 mM Tris pH 8.0, cells will be  
634 flash-frozen in liquid nitrogen, thawed on ice, and incubated for 30 min at 4°C with gentle rotation  
635 in 3 mL LB buffer (50 mM Tris, 150 mM NaCl, 0.5% Triton-X100, 1 mM DTT, supplemented with  
636 proteases and phosphatase inhibitors; Invitrogen). Next, the lysates were sonicated for 30 min with a  
637 Bioruptor Plus (Diagenode), followed by clarification by centrifugation. Immunoprecipitations were  
638 performed using a GFP-Trap (Chromotek). After 2 h of incubation, the beads were washed 6 times  
639 with LB buffer and finally, the proteins were eluted with 50 mM glycine pH 2.8. After neutralization  
640 with Tris pH 8.0, proteins were precipitated with PRM reagent (0.05 mM pyrogallol red, 0.16 mM  
641 sodium molybdate, 1 mM sodium oxalate, 50 mM succinic acid; pH 2.5 (Sigma-Aldrich)) prior to  
642 MS analysis in the Laboratory of Mass Spectrometry, IBB PAS (Marshall et al., 1995).



## 643 **Western Blotting**

644 For western blot analysis equal amount of cells were lysed with 0.1% NP40 in PBS supplemented  
645 with protease inhibitors and viscolase (A&A Biotechnology) for 30 min in 37°C with shaking 600  
646 rpm, then Laemmli buffer was added and samples were denatured for 10 min in 100°C. For secreted  
647 proteins analysis, the cell culture medium was collected and centrifuged twice 15 min 13 500 rpm,  
648 then the supernatant was collected, Laemmli buffer was added and samples were denatured for 10  
649 min in 100°C. Samples were separated on 12-15% SDS-PAGE gels, proteins were transferred to  
650 Protran nitrocellulose membranes (GE Healthcare) and then membranes were stained with 0.3% w/v  
651 Ponceau S in 3% v/v acetic acid and digitized. Membranes were incubated with 5% milk or 5% BSA  
652 in TBST buffer according to the technical recommendations of the antibodies' suppliers for 1 hour  
653 followed by incubation with specific primary antibodies (listed in the Key Resources Table) diluted  
654 1:10 000 ( $\alpha$ -tubulin), 1:5 000 (IgG, Ig $\lambda$ , IgG $\kappa$ ), 1:3 000 (IL6, GRP94), 1:2 000 (PERK, Xbp1 or 1:1  
655 000 (Ire1, ATF6, FLAG) overnight in 4°C. Membranes were washed 3 times in TBST buffer,  
656 incubated with HRP-conjugated secondary antibodies (anti-mouse diluted 1:5 000 anti-rabbit diluted  
657 1:3 000) for 2 hours at RT. Membranes were washed 3 times in TBST buffer and proteins were  
658 visualized by enhanced chemiluminescence acquired on X-ray film.

659

## 660 **Flow Cytometry Analysis**

661 Splenocytes and bone marrow were isolated as described above, and after depletion of red blood cells  
662 with ACK buffer cells were stained respectively. Designed staining panels were based on the „Flow  
663 cytometry tools for the study of B cell biology” (BD Pharmingen) (Pracht et al., 2017). The antibodies  
664 and other reagents used for flow cytometry analysis are listed in the Key Resources Table. Samples  
665 were measured with BD LSRFortessa™ (BD) and analyzed using FlowJo (Data Analysis Software  
666 v10).

## 667 **Surface staining for analysis of early developmental stages of B cells.**

668  $1.5 \times 10^6$  cells isolated from bone marrow or spleen were pelleted and incubated with Fc Block (anti-  
669 CD16/32) for 10 min RT. After washing with FACS buffer (0.2% BSA in PBS) cells isolated from  
670 bone marrow were stained with anti-CD19 BUV395, anti-CD43 BV421, anti-CD23 BV421, anti-IgM  
671 FITC, anti-CD249 PE, anti-CD93 PE, anti-IgD BV605, anti-CD45R/B220 APC, anti-CD24 PerCP  
672 Cy5.5, anti-CD21 PerCP Cy5.5 antibodies for 30 min in 4°C, protected from light. In case, when two  
673 antibodies produced with BD Horizon technology were used in one staining panel, Brilliant Stain  
674 Buffer was used to prepare the antibody mix. After staining, cells were washed with FACS buffer  
675 and then stained with LIVE/DEAD™ Fixable IR Dead Cell Stain Kit for 20 min in 4°C, protected  
676 from light. Finally, cells were washed and analyzed in terms of calculation PreProB, ProB, PreB,

677 immature, transitional B, early and late mature B, T1, T2, T3, follicular B I and II and marginal cell  
678 subsets (Marginal Zone and Marginal Zone Progenitor).

679

680 ***Surface staining for analysis of plasmablasts and plasma cells.***

681  $2.5 \times 10^6$  cells isolated from bone marrow or spleen were incubated with Fc Block (anti-CD16/32) for  
682 10 min RT, washed with FACS buffer and incubated with anti-CD19 BUV395, anti-CD19 AF700,  
683 anti-IgM FITC, anti-IgA PE, anti-CD138 BV605, anti-CD138 PE, anti-IgG1 AF647, anti-  
684 CD45R/B220 PerCP Cy5.5 antibodies for 30 min in 4°C, protected from light. In case, when two  
685 antibodies produced with BD Horizon technology were used in one staining panel, Brilliant Stain  
686 Buffer was used to prepare the antibody mix. Next cells were washed with FACS buffer and then  
687 stained with LIVE/DEAD™ Fixable Near-IR or Violet Dead Cell Stain Kit for 20 min in 4°C,  
688 protected from light. Finally, cells were washed and analyzed in terms of calculation dividing  
689 plasmablasts, early plasmocytes and mature resting plasmocytes.

690

691 ***Cytoplasmic staining for analysis of intracellular immunoglobulins.***

692  $2.5 \times 10^6$  cells isolated from bone marrow or spleen were incubated with Fc Block (anti-CD16/32) for  
693 10 min RT. After washing with FACS buffer (0.2% BSA in PBS) cells isolated from bone marrow  
694 were stained with anti-CD19 BUV395, anti-CD138 BV605, anti-CD45R/B220 PerCP Cy5.5  
695 antibodies for 30 min in 4°C, protected from light. Cells were washed with FACS buffer and then  
696 incubated in Fixation/Permeabilization Solution for 20 min in 4°C. Upon washing in  
697 Wash/Permeabilization solution, cells were stained with anti-IgM FITC, anti-IgA PE, anti-IgG1  
698 AF647 for 30 min in 4°C. After washing cells were analyzed in terms of calculation  
699 intracellular/cytoplasmic intracellular immunoglobulin content.

700

701 ***Intracellular ER staining with for live-cell imaging.***

702  $1 \times 10^6$  cells were resuspended in HSB buffer and then were incubated with 0.75  $\mu$ l of ER-Tracker™  
703 Red (BODIPY™ TR Glibenclamide) for 30 min at 4°C, in the dark.

704

705 ***Splenocyte fractionation***

706 Activated B cells isolated from TENT5C-FLAG mice were fractionated using a Subcellular Protein  
707 Fractionation Kit for Cultured Cells (Invitrogen) according to the manufacturer's instruction. The  
708 resulting fractions were analyzed by western blot.

709

710

## 711 ***ER stress analysis***

712 WT and TENT5C KO B cells were activated with LPS (20  $\mu$ g/ml) and IL-4 (20 ng/ml) for 3 days.  
713 Then tunicamycin (Sigma) was added to a final concentration 1 or 2.5  $\mu$ g/ml for 5 hours and cells  
714 were collected. RNA was isolated using TRI reagent (Sigma) according to the manufacturer's  
715 instructions and estimations of Xbp1 splicing and expression level of PERK, CHOP, GRP94, Ero1B  
716 and Ire1 $\alpha$  genes were carried out by RT-qPCR reactions as described above. Cells were also used for  
717 protein isolation and western blot analysis of UPR markers level (XBP1, Ire1, PERK, ATF6) as  
718 described above.

719

## 720 **QUANTIFICATION AND STATISTICAL ANALYSIS**

721 Statistical analysis of quantitative data was performed using Prism software (GraphPad), unless  
722 otherwise stated. The statistical tests used in each instance are mentioned in the figure legends. All  
723 data were checked for normality using Shapiro-Wilk test. Outliers were identified in GraphPad Prism  
724 using ROUT method, with Q (FDR) value set to 1%, and removed from subsequent analyses.

725 Data are presented as scatter dot plots or bar plots, with mean values indicated and standard deviation  
726 shown as the error bars. Statistical significance is marked as: ns - not significant,  
727 \*  $p < 0.05$ , \*\*  $p < 0.01$ , \*\*\*  $p < 0.001$ , \*\*\*\*  $p < 0.0001$ .

728

## 729 ***Differential Expression Analysis***

730 Obtained sequencing reads were quality filtered using cutadapt (v. 1.18), to remove adapter  
731 sequences, low-quality fragments (minimum quality score was set to 20) and too short sequences  
732 (threshold set to 30 nt) (Martin, 2011). Such quality filtered reads were aligned to the mouse genome  
733 (GRCm38, downloaded from the ENSEMBL FTP site, release 94) using the STAR split read aligner  
734 (v. 2.6.1a) (Dobin et al., 2013). Counts for each transcript were collected using featureCounts from  
735 Subread package (v. 1.6.3), with options -Q 10 -p -B -C -s 2 -g gene\_id -t exon and Gencode vM19  
736 annotation (Liao et al., 2014). Statistical analysis of differential expression was performed using the  
737 DESeq2 (v. 1.22) Bioconductor package (Love et al., 2014), using default settings, correcting for the  
738 batch effect.

739

## 740 ***Polyadenylation analysis using Nanopore Direct RNA Sequencing***

741 To generate B cells specific reference transcriptome we used FLAIR v1.2  
742 (<https://github.com/BrooksLabUCSC/flair>) (Tang A et al., 2018). In detail, nanopore reads from all  
743 analyzed samples were mapped to the GRCm38 genome with flair.py align. Misaligned splice sites

744 were corrected with flair correct and splice junctions file created by STAR mapping of all Illumina  
745 reads to GRCm38 genome. High confidence isoforms dataset was created using flair collapse, and  
746 further annotated against GencodeVM19 using spliced\_bam2gff from pinfish  
747 (<https://github.com/nanoporetech/pinfish>) and GFFCompare (v. 0.10.6,  
748 <https://ccb.jhu.edu/software/stringtie/gffcompare.shtml>).

749

750 Nanopore reads were mapped back to such created reference transcriptome using Minimap 2.14 (Li,  
751 2018). The poly(A) tail lengths for each read were estimated using Nanopolish 0.10.2 polyA function  
752 (Workman et al., 2018). In subsequent analyses, only length estimates with QC tag reported by  
753 Nanopolish as PASS were considered. Statistical analysis was performed using functions provided in  
754 the NanoTail R package (<https://github.com/smaegol/nanotail>). In detail, we used the Generalized  
755 Linear Model approach, with  $\log_2(\text{polya length})$  as a response variable. To correct for the batch effect,  
756 a replicate identifier was used as one of the predictors, in addition to condition (TENT5CKO/WT)  
757 identifier. Collected P values (for the condition effect) were adjusted for multiple comparisons using  
758 the Benjamini-Hochberg method. Transcripts were considered as having poly(A) tail significantly  
759 changed between analyzed conditions, if the adjusted p.value was less than 0.05, the absolute  
760 difference in the median tail length was at least 10, and there were at least 10 supporting reads for  
761 each condition.

762

## 763 **DATA AND CODE AVAILABILITY**

764 All mRNA expression data that support the findings of this study have been deposited at GEO under  
765 accession number GSE132883 (temporarily token for a read-only access for reviewers:  
766 qruhwomczzkjfwj). The raw basecalled data from Nanopore Direct RNA Sequencing are deposited  
767 at European Nucleotide Archive, under study accession number PRJEB33089.

768

## 769 **Literature.**

770 Alasaad, S., Rossi, L., Maione, S., Sartore, S., Soriguer, R.C., Perez, J.M., Rasero, R., Zhu, X.Q., and  
771 Soglia, D. (2008). HotSHOT Plus ThermalSHOCK, a new and efficient technique for preparation of  
772 PCR-quality mite genomic DNA. *Parasitol Res* 103, 1455-1457.

773 Amend, S.R., Valkenburg, K.C., and Pienta, K.J. (2016). Murine Hind Limb Long Bone Dissection  
774 and Bone Marrow Isolation. *J Vis Exp*.

775 Aragon I.V., Barrington R.A., Jackowski S., Mori K., and Brewer J.W. (2012). The specialized  
776 unfolded protein response of B lymphocytes: ATF6 $\alpha$ -independent development of antibody-secreting  
777 B cells. *Mol Immunol*. 51, 347-55.

778

779 Bajak, E.Z., and Hagedorn, C.H. (2008). Efficient 5' cap-dependent RNA purification : use in  
780 identifying and studying subsets of RNA. *Methods in molecular biology* 419, 147-160.

781 Braakman, I., and Hebert, D.N. (2013). Protein folding in the endoplasmic reticulum. *Cold Spring*  
782 *Harbor perspectives in biology* 5, a013201.

783 Chang, H., Lim, J., Ha, M., and Kim, V.N. (2014). TAIL-seq: genome-wide determination of poly(A)  
784 tail length and 3' end modifications. *Molecular cell* 53, 1044-1052.

785 Choi, Y.H., and Hagedorn, C.H. (2003). Purifying mRNAs with a high-affinity eIF4E mutant  
786 identifies the short 3' poly(A) end phenotype. *Proceedings of the National Academy of Sciences of*  
787 *the United States of America* 100, 7033-7038.

788 Chorghade S., Seimetz J., Emmons R., Yang J., Bresson S.M., Lisio M., Parise G., Conrad N.K., and  
789 Kalsotra A. (2017). Poly(A) tail length regulates PABPC1 expression to tune translation in the heart.  
790 *Elife*. 6, e24139.

791 Danger, R., Braza, F., Giral, M., Soulillou, J.P., and Brouard, S. (2014). MicroRNAs, Major Players  
792 in B Cells Homeostasis and Function. *Front Immunol* 5, 98.

793 De Silva, N.S., and Klein, U. (2015). Dynamics of B cells in germinal centres. *Nat Rev Immunol* 15,  
794 137-148.

795 Diaz-Munoz, M.D., Monzon-Casanova, E., and Turner, M. (2017). Characterization of the B Cell  
796 Transcriptome Bound by RNA-Binding Proteins with iCLIP. *Methods in molecular biology* 1623,  
797 159-179.

798 Dobin, A., Davis, C.A., Schlesinger, F., Drenkow, J., Zaleski, C., Jha, S., Batut, P., Chaisson, M.,  
799 and Gingeras, T.R. (2013). STAR: ultrafast universal RNA-seq aligner. *Bioinformatics* 29, 15-21.

800 Eaton J.D., Davidson L., Bauer D.L.V., Natsume T., Kanemaki M.T., and West S. (2018). Xrn2  
801 accelerates termination by RNA polymerase II, which is underpinned by CPSF73 activity. *Genes*  
802 *Dev.* 32, 127-139.

803 Enders, A., Short, A., Miosge, L.A., Bergmann, H., Sontani, Y., Bertram, E.M., Whittle, B.,  
804 Balakishnan, B., Yoshida, K., Sjollem, G., *et al.* (2014). Zinc-finger protein ZFP318 is essential for  
805 expression of IgD, the alternatively spliced Igh product made by mature B lymphocytes. *Proceedings*  
806 *of the National Academy of Sciences of the United States of America* 111, 4513-4518.

807 Feng, Y., Zhang, Y., Ying, C., Wang, D., and Du, C. (2015). Nanopore-based fourth-generation DNA  
808 sequencing technology. *Genomics Proteomics Bioinformatics* 13, 4-16.

809 Friday, A.J., and Keiper, B.D. (2015). Positive mRNA Translational Control in Germ Cells by  
810 Initiation Factor Selectivity. *Biomed Res Int* 2015, 327963.

- 811 Garalde, D.R., Snell, E.A., Jachimowicz, D., Sipos, B., Lloyd, J.H., Bruce, M., Pantic, N., Admassu,  
812 T., James, P., Warland, A., *et al.* (2018). Highly parallel direct RNA sequencing on an array of  
813 nanopores. *Nature methods* 15, 201-206.
- 814 Gass, J.N., Gunn, K.E., Sriburi, R., and Brewer, J.W. (2004). Stressed-out B cells? Plasma-cell  
815 differentiation and the unfolded protein response. *Trends Immunol* 25, 17-24.
- 816 Goldfinger, M., Shmuel, M., Benhamron, S., and Tirosh, B. (2011). Protein synthesis in plasma cells  
817 is regulated by crosstalk between endoplasmic reticulum stress and mTOR signaling. *Eur J Immunol*  
818 41, 491-502.
- 819 Harrison, P.F., Powell, D.R., Clancy, J.L., Preiss, T., Boag, P.R., Traven, A., Seemann, T., and  
820 Beilharz, T.H. (2015). PAT-seq: a method to study the integration of 3'-UTR dynamics with gene  
821 expression in the eukaryotic transcriptome. *Rna* 21, 1502-1510.
- 822 Houseley, J., and Tollervey, D. (2009). The many pathways of RNA degradation. *Cell* 136, 763-776.
- 823 Hrit, J., Raynard, N., Van Etten, J., Sankar, K., Petterson, A., and Goldstrohm, A.C. (2014). In vitro  
824 analysis of RNA degradation catalyzed by deadenylase enzymes. *Methods in molecular biology* 1125,  
825 325-339.
- 826 Kakiuchi-Kiyota S., Arnold L.L., Yokohira M., Koza-Taylor P., Suzuki S., Varney M., Pennington  
827 K.L., and Cohen S.M. (2011). Evaluation of direct and indirect effects of the PPAR $\gamma$  agonist  
828 troglitazone on mouse endothelial cell proliferation. *Toxicol Pathol.* 39, 1032-45.
- 829 Kang, S.M., Yoo, D.G., Kim, M.C., Song, J.M., Park, M.K., O, E., Quan, F.S., Akira, S., and  
830 Compans, R.W. (2011). MyD88 plays an essential role in inducing B cells capable of differentiating  
831 into antibody-secreting cells after vaccination. *J Virol* 85, 11391-11400.
- 832 Kirk, S.J., Cliff, J.M., Thomas, J.A., and Ward, T.H. (2010). Biogenesis of secretory organelles  
833 during B cell differentiation. *J Leukoc Biol* 87, 245-255.
- 834 Kobyłeczki K., Drajzkowska K., Kuliński T.M., Dziembowski A., and Tomecki R. (2018). Elimination  
835 of 01/A'-A0 pre-rRNA processing by-product in human cells involves cooperative action of two  
836 nuclear exosome-associated nucleases: RRP6 and DIS3. *RNA.* 24, 1677-1692.
- 837 Kolesnikova I.S., Dolskiya A.A., Lemskaya N.A., Maksimova Y.V., Shorina A.R., Graphodatsky  
838 A.S., Galanina E.M., and Yudkin D.V. (2018). Alteration of rRNA gene copy number and expression  
839 in patients with intellectual disability and heteromorphic acrocentric chromosomes. *Egyptian Journal*  
840 *of Medical Human Genetics.* 19, 129-134.
- 841 Koralov, S.B., Muljo, S.A., Galler, G.R., Krek, A., Chakraborty, T., Kanellopoulou, C., Jensen, K.,  
842 Cobb, B.S., Merckenschlager, M., Rajewsky, N., and Rajewsky, K. (2008). Dicer ablation affects  
843 antibody diversity and cell survival in the B lymphocyte lineage. *Cell* 132, 860-874.



- 844 Kuchta, K., Knizewski, L., Wyrwicz, L.S., Rychlewski, L., and Ginalski, K. (2009). Comprehensive  
845 classification of nucleotidyltransferase fold proteins: identification of novel families and their  
846 representatives in human. *Nucleic acids research* *37*, 7701-7714.
- 847 Kuchta, K., Muszewska, A., Knizewski, L., Steczkiewicz, K., Wyrwicz, L.S., Pawlowski, K.,  
848 Rychlewski, L., and Ginalski, K. (2016). FAM46 proteins are novel eukaryotic non-canonical  
849 poly(A) polymerases. *Nucleic acids research* *44*, 3534-3548.
- 850 Legnini I., A.J., Karaikos N., Ayoub S., Rajewsky N. (2018). Full-length mRNA sequencing reveals  
851 principles of poly(A) tail length control. *Biorxiv*, <https://doi.org/10.1101/547034>.
- 852 Li, H. (2018). Minimap2: pairwise alignment for nucleotide sequences. *Bioinformatics* *34*, 3094-  
853 3100.
- 854 Li, M.Z., and Elledge, S.J. (2012). SLIC: a method for sequence- and ligation-independent cloning.  
855 *Methods in molecular biology* *852*, 51-59.
- 856 Liao, Y., Smyth, G.K., and Shi, W. (2014). featureCounts: an efficient general purpose program for  
857 assigning sequence reads to genomic features. *Bioinformatics* *30*, 923-930.
- 858 Lima, S.A., Chipman, L.B., Nicholson, A.L., Chen, Y.H., Yee, B.A., Yeo, G.W., Coller, J., and  
859 Pasquinelli, A.E. (2017). Short poly(A) tails are a conserved feature of highly expressed genes. *Nature*  
860 *structural & molecular biology* *24*, 1057–1063.
- 861 Liu, B., and Li, Z. (2008). Endoplasmic reticulum HSP90b1 (gp96, grp94) optimizes B-cell function  
862 via chaperoning integrin and TLR but not immunoglobulin. *Blood* *112*, 1223-1230.
- 863 Love, M.I., Huber, W., and Anders, S. (2014). Moderated estimation of fold change and dispersion  
864 for RNA-seq data with DESeq2. *Genome biology* *15*, 550.
- 865 Lynes, E.M., and Simmen, T. (2011). Urban planning of the endoplasmic reticulum (ER): how diverse  
866 mechanisms segregate the many functions of the ER. *Biochimica et biophysica acta* *1813*, 1893-1905.
- 867 Marshall, T., Abbott, N.J., Fox, P., and Williams, K.M. (1995). Protein concentration by precipitation  
868 with pyrogallol red prior to electrophoresis. *Electrophoresis* *16*, 28-31.
- 869 Martin, M. (2011). Cutadapt removes adapter sequences from high-throughput sequencing reads.  
870 *EMBnet.Journal* *17*, 10–12.
- 871 Mroczek, S., Chlebowska, J., Kulinski, T.M., Gewartowska, O., Gruchota, J., Cysewski, D.,  
872 Liudkovska, V., Borsuk, E., Nowis, D., and Dziembowski, A. (2017). The non-canonical poly(A)  
873 polymerase FAM46C acts as an onco-suppressor in multiple myeloma. *Nat Commun* *8*, 619.
- 874 Nicholson, A.L., and Pasquinelli, A.E. (2018). Tales of Detailed Poly(A) Tails. *Trends in cell biology*.
- 875 Pasare, C., and Medzhitov, R. (2005). Control of B-cell responses by Toll-like receptors. *Nature* *438*,  
876 364-368.
- 877 Osowski C.M., and Urano F. (2011). Measuring ER stress and the unfolded protein response using  
878 mammalian tissue culture system. *Methods Enzymol.* *490*, 71-92.

- 879 Peng, Y., Yuan, J., Zhang, Z., and Chang, X. (2017). Cytoplasmic poly(A)-binding protein 1  
880 (PABPC1) interacts with the RNA-binding protein hnRNPLL and thereby regulates immunoglobulin  
881 secretion in plasma cells. *The Journal of biological chemistry* 292, 12285-12295.
- 882 Pioli, P.D., Debnath, I., Weis, J.J., and Weis, J.H. (2014). Zfp318 regulates IgD expression by  
883 abrogating transcription termination within the Ighm/Ighd locus. *J Immunol* 193, 2546-2553.
- 884 Pracht, K., Meinzinger, J., Daum, P., Schulz, S.R., Reimer, D., Hauke, M., Roth, E., Mielenz, D.,  
885 Berek, C., Corte-Real, J., *et al.* (2017). A new staining protocol for detection of murine antibody-  
886 secreting plasma cell subsets by flow cytometry. *Eur J Immunol* 47, 1389-1392.
- 887 Reimold, A.M., Iwakoshi, N.N., Manis, J., Vallabhajosyula, P., Szomolanyi-Tsuda, E., Gravalles,  
888 E.M., Friend, D., Grusby, M.J., Alt, F., and Glimcher, L.H. (2001). Plasma cell differentiation  
889 requires the transcription factor XBP-1. *Nature* 412, 300-307.
- 890 Schuck, S., Prinz, W.A., Thorn, K.S., Voss, C., and Walter, P. (2009). Membrane expansion alleviates  
891 endoplasmic reticulum stress independently of the unfolded protein response. *The Journal of cell*  
892 *biology* 187, 525-536.
- 893 Serrano R.L., Yu W., and Terkeltaub R. (2014). Mono-allelic and bi-allelic ENPP1 deficiency  
894 promote post-injury neointimal hyperplasia associated with increased C/EBP homologous protein  
895 expression. *Atherosclerosis*. 233, 493-502.
- 896 Shi, W., Liao, Y., Willis, S.N., Taubenheim, N., Inouye, M., Tarlinton, D.M., Smyth, G.K., Hodgkin,  
897 P.D., Nutt, S.L., and Corcoran, L.M. (2015). Transcriptional profiling of mouse B cell terminal  
898 differentiation defines a signature for antibody-secreting plasma cells. *Nat Immunol* 16, 663-673.
- 899 Siwaszek, A., Ukleja, M., and Dziembowski, A. (2014). Proteins involved in the degradation of  
900 cytoplasmic mRNA in the major eukaryotic model systems. *RNA Biol* 11, 1122-1136.
- 901 Szczesny, R.J., Kowalska, K., Klosowska-Kosicka, K., Chlebowski, A., Owczarek, E.P., Warkocki,  
902 Z., Kulinski, T.M., Adamska, D., Affek, K., Jedroszkowiak, A., *et al.* (2018). Versatile approach for  
903 functional analysis of human proteins and efficient stable cell line generation using FLP-mediated  
904 recombination system. *PloS one* 13, e0194887.
- 905 Takagaki, Y., and Manley, J.L. (1998). Levels of polyadenylation factor CstF-64 control IgM heavy  
906 chain mRNA accumulation and other events associated with B cell differentiation. *Molecular cell* 2,  
907 761-771.
- 908 Tang, A., C.S., van Baren M., Hart K., Hrabeta-Robinson E., Wu C., Brooks A. (2018). Full-length  
909 transcript characterization of SF3B1 mutation in chronic lymphocytic leukemia reveals  
910 downregulation of retained introns. *Biorxiv*, <https://doi.org/10.1101/410183>.
- 911 Tellier, J., Shi, W., Minnich, M., Liao, Y., Crawford, S., Smyth, G.K., Kallies, A., Busslinger, M.,  
912 and Nutt, S.L. (2016). Blimp-1 controls plasma cell function through the regulation of  
913 immunoglobulin secretion and the unfolded protein response. *Nat Immunol* 17, 323-330.

- 914 Thai, T.H., Calado, D.P., Casola, S., Ansel, K.M., Xiao, C., Xue, Y., Murphy, A., Frenthewey, D.,  
915 Valenzuela, D., Kutok, J.L., *et al.* (2007). Regulation of the germinal center response by microRNA-  
916 155. *Science* 316, 604-608.
- 917 Tsuru A., Imai Y., Saito M., and Kohno K. (2016). Novel mechanism of enhancing IRE1 $\alpha$ -XBP1  
918 signalling via the PERK-ATF4 pathway. *Scientific Reports* 6, 24217
- 919 Vigorito, E., Perks, K.L., Abreu-Goodger, C., Bunting, S., Xiang, Z., Kohlhaas, S., Das, P.P., Miska,  
920 E.A., Rodriguez, A., Bradley, A., *et al.* (2007). microRNA-155 regulates the generation of  
921 immunoglobulin class-switched plasma cells. *Immunity* 27, 847-859.
- 922 Warkocki, Z., Liudkovska, V., Gewartowska, O., Mroczek, S., and Dziembowski, A. (2018).  
923 Terminal nucleotidyl transferases (TENTs) in mammalian RNA metabolism. *Philos Trans R Soc*  
924 *Lond B Biol Sci* 373.
- 925 Welch, J.D., Slevin, M.K., Tatomer, D.C., Duronio, R.J., Prins, J.F., and Marzluff, W.F. (2015). EnD-  
926 Seq and AppEnD: sequencing 3' ends to identify nontemplated tails and degradation intermediates.  
927 *Rna* 21, 1375-1389.
- 928 Wiest, D.L., Burkhardt, J.K., Hester, S., Hortsch, M., Meyer, D.I., and Argon, Y. (1990). Membrane  
929 biogenesis during B cell differentiation: most endoplasmic reticulum proteins are expressed  
930 coordinately. *The Journal of cell biology* 110, 1501-1511.
- 931 Woo, Y.M., Kwak, Y., Namkoong, S., Kristjansdottir, K., Lee, S.H., Lee, J.H., and Kwak, H. (2018).  
932 TED-Seq Identifies the Dynamics of Poly(A) Length during ER Stress. *Cell reports* 24, 3630-3641  
933 e3637.
- 934 Workman, R.E., Tang, A., Tang, P.S., Jain, M., Tyson, J.R., Zuzarte, P.C., Gilpatrick, T., Razaghi,  
935 R., Quick, J., Sadowski, N., *et al.* (2018). Nanopore native RNA sequencing of a human poly(A)  
936 transcriptome. *Biorxiv*, <https://doi.org/10.1101/459529>.
- 937 Xu, S., Guo, K., Zeng, Q., Huo, J., and Lam, K.P. (2012). The RNase III enzyme Dicer is essential  
938 for germinal center B-cell formation. *Blood* 119, 767-776.
- 939 Zhu, Y.X., Shi, C.X., Bruins, L.A., Jedlowski, P., Wang, X., Kortum, K.M., Luo, M., Ahmann, J.M.,  
940 Braggio, E., and Stewart, A.K. (2017). Loss of FAM46C Promotes Cell Survival in Myeloma. *Cancer*  
941 *Res* 77, 4317-4327.

942

943

944

945

946

947 **Figure 1. TENT5C regulates the steady-state level of immunoglobulins mRNAs through**  
948 **polyadenylation.**

949 (A) Library preparation workflow for Nanopore direct RNA sequencing.

950 (B) (C) (D) Nanopore-based poly(A) lengths profiling of B cells isolated from WT and TENT5C KO,  
951 activated with LPS and IL4 for 7 days. Density distribution plots for all transcripts (B), Ig heavy  
952 chains transcripts (C) and Ig light chains (kappa) transcripts (D) scaled to a maximum of 1, are shown.  
953 Vertical dashed lines represent median poly(A) lengths for each condition.

954 (E) Scatter plot of raw counts for individual transcripts obtained with Nanopore direct RNA  
955 sequencing for WT (x-axis) and TENT5C KO (y-axis). Immunoglobulins transcripts are marked in  
956 orange.

957 (F) Volcano plot showing the results of DESeq2 differential expression analysis on data from  
958 Illumina sequencing of RNA isolated from B cells of WT and TENT5C KO animals activated with  
959 LPS and IL4 for 7 days. Immunoglobulins transcripts are marked in orange, dashed line marks the  
960 P value significance threshold (0.05).

961 (G) Reverse transcription-qPCR analysis of immunoglobulins mRNA expression in WT and  
962 TENT5C KO cells. Values are shown as fold changes to WT. P values were calculated using unpaired  
963 Student's t-test ( $n \geq 6$ ).

964 (H) Northern Blot analysis of  $\kappa$  and  $\lambda$  IgG mRNAs isolated from WT (lane 1) and TENT5C KO (lane  
965 2) B cells activated with LPS and IL4 for 7 days.

966

967 **Figure 2. Polyadenylation of immunoglobulins mRNAs by TENT5C enhances their expression.**

968 (A) Western Blot analysis of IgG heavy and light ( $\kappa$  and  $\lambda$ ) chains, IL6 and GRP94 from WT (lane  
969 1) and TENT5C KO (lane 2) B cells, activated with LPS and IL4 for 3 days. Ponceau S staining was  
970 used as a loading control.

971 (B) Western Blot analysis of immunoglobulins secreted to media by WT (lane 1) and TENT5C KO  
972 (lane 2), over 3 days of activation. Ponceau S staining was used as a loading control.

973 (C) Percentage of IgG1 and IgA positive cells in WT and TENT5C KO B cells activated *in vitro* with  
974 LPS and IL4 for 3 days. P values were calculated using the Mann-Whitney U test ( $n = 4$ ).

975 (D) Flow cytometry analysis of intracellular Ig isotypes levels in mature resting PCs isolated from  
976 bone marrow or spleen. Plasma cell populations were analyzed based on CD138, CD19, CD45R,

977 IgM, IgG1 and IgA staining. See gating strategy in Supplementary Figure 4. IgG1-positive cells are  
978 marked with red rectangles, IgA-positive cells are marked with blue rectangles.

979 (E) Percentage of mature resting PC positive cells for intracellular IgG1 or IgA isotypes. P values  
980 were calculated using the Mann-Whitney U test ( $n \geq 7$ ).

981 (F) Examination of blood serum albumins, alpha globulins, alpha 2 globulins, beta globulins, gamma  
982 globulins and total protein levels in TENT5C KO and control animals by SPEP. P values were  
983 calculated using unpaired t-test with Welch's correction ( $n \geq 25$ ).

984 (G) Evaluation of iron level in blood serum of TENT5C KO and control animals. P value was  
985 calculated using unpaired t-test with Welch's correction ( $n \geq 17$ ).

986

987 **Figure 3. Expression of TENT5C is limited to the last stages of B cell lineage differentiation.**

988 (A, B) Flow cytometry analysis of TENT5C-GFP expression in a subpopulation of CD138<sup>high</sup> cells  
989 activated *in vitro* with LPS and IL4 for 6 days (A) or up to 10 days (B) presented as pseudo-color dot  
990 blot (A) and/or histograms of GFP-fluorescence intensity (B). Grey color refers to WT, green is  
991 related to TENT5C-GFP. Detailed gating strategy is presented in related Supplementary Figure 4.

992 (C, D) Flow cytometry analysis of TENT5C-GFP expression in splenocytes and BM (C) and different  
993 splenic PC subpopulations (D): dividing plasmablasts, early PC, mature resting PC. Colour code as  
994 described above. See also Supplementary Figures 2 and 4.

995 (E) Immunohistochemical staining for plasma cell marker CD138 and GFP in spleens of wild-type  
996 and TENT5C-GFP *knock-in* mice. Scale bar denotes 50  $\mu\text{m}$ .

997

998 **Figure 4. TENT5C is specifically upregulated by specific TLR signaling.**

999

1000 (A, B) Analysis of the B cells activation process, measured by the evaluation of co-expression of  
1001 CD138 and GFP molecules (red quarter, left columns) and further differentiation process of  
1002 CD138<sup>high</sup>GFP<sup>pos</sup> into dividing plasmablasts, early PC and mature resting PC (right column).

1003 B cells isolated from WT (A) and TENT5C-GFP (B) mice, were treated with different activators  
1004 (indicated on the right part of the plot) for 4 days: TLR1/2 agonist (Pam3CSK4), TLR2 Agonist  
1005 (HKLM), TLR4 agonist (LPS-EK standard), TLR6/2 agonist (FSL1), TLR9 Agonist (ODN1826),  
1006 megaCD40L (trimer), anti-IgM and LPS/IL4 as a positive control. Flow cytometry analysis was based  
1007 on the live/dead, CD138, CD45R and CD19 staining and additionally GFP. See also Supplementary  
1008 Figure 4.

1009

1010 **Figure 5. TENT5C negatively regulates B cell lineage differentiation into PC.**

1011 (A) Comparison of spleen mass in WT and TENT5C KO mice (right panel). P values were calculated  
1012 with unpaired t-test with Welch's correction ( $n \geq 25$ ). Pictures (left panel) show the representative  
1013 difference in the spleen size between WT and TENT5C KO in two replicates.

1014 (B) Comparison of body mass in WT and TENT5C KO mice. P values were calculated with unpaired  
1015 t-test with Welch's correction ( $n=12$ ).

1016 (C) Flow cytometry quantitative analysis of CD138<sup>positive</sup> cells (upper pseudocolor dot blots) and  
1017 particular CD138<sup>high</sup> subsets: dividing plasmablasts, early PC and mature resting PC (lower  
1018 pseudocolor dot blots) in WT and TENT5C KO. Plasma cell populations were analyzed based on  
1019 CD138, CD19, CD45R, IgM, IgG1 and IgA staining. See gating strategy in Supplementary Figure 4.

1020 (D) Percentages of CD138<sup>high</sup> cells in WT and TENT5C KO in both bone marrow and spleen. P values  
1021 were calculated using the Mann-Whitney U test ( $n \geq 7$ ). See Supplementary Figure 6 for other cell  
1022 subpopulations.

1023 (E) Comparison of CD138<sup>high</sup> subpopulations (selected as shown in the panel C): dividing  
1024 plasmablasts, early PC, mature resting PC in WT and TENT5C KO in both bone marrow and spleen.  
1025 P values were calculated using two-way ANOVA with post-hoc Bonferroni test ( $n=8$ ).

1026

1027 **Figure 6. TENT5C KO plasmacytes are characterized by the abnormalities in the class switch**  
1028 **recombination (CSR).**

1029 (A) (B) (C) Flow cytometry analysis of surface Ig isotypes: IgM vs IgG1 (A), IgM vs IgA (B), IgA  
1030 vs IgG1 (C) in dividing plasmablasts, early PC and mature resting PCs isolated from bone marrow or  
1031 spleen (representative contour blots are shown). Plasma cell populations were analyzed based on  
1032 CD138, CD19, CD45R, IgM, IgG1 and IgA staining. See gating strategy in Supplementary Figure 4.

1033 (D, E, F) Percentage of cells positive for surface IgM (D), IgG1 (E), or IgA (F) immunoglobulins in  
1034 dividing plasmablasts, early PC and mature resting PCs isolated from bone marrow or spleen. P values  
1035 were calculated with two-way ANOVA with post hoc Bonferroni test ( $n=8$ ).

1036

1037 **Figure 7. TENT5C is a membrane-associated protein and affects UPR response.**

1038 (A) Endogenous TENT5C localizes mainly to the membranes and cytosolic fractions. B cells were  
1039 isolated from TENT5C-FLAG mouse, activated with LPS and IL4 for 3 days and fractionated for S  
1040 – cytoskeletal (lane 1), Ch – chromatin (lane 2), N – soluble nuclear (lane 3), M – membrane (lane  
1041 4), C – cytoplasm (lane 5), and analysed with Western blot using an anti-FLAG antibody. Arrow



1042 indicates the position of TENT5C-FLAG while asterisks indicate nonspecific bands detected by anti-  
1043 FLAG antibodies.

1044 (B) Staining of the nucleus and the ER of CD138 positive cells isolated from wild-type and TENT5C-  
1045 GFP *knock-in* mice. Scale bar denotes 10  $\mu$ m.

1046 (C) Flow cytometry analysis of ER-fluorescence intensity in CD138<sup>high</sup> cells and mature resting PC.  
1047 Cells were isolated from WT (marked in green) and TENT5C KO (shown in red). The measurements  
1048 were performed at day 0 and 4 days after activation (LPS and IL4). Plasma cell populations were  
1049 analyzed based on CD138, CD19, CD45R, and ER-tracker. See gating strategy in Supplementary  
1050 Figure 4.

1051 (D) Quantification of ER volume, measured as gMFI (geometric mean of fluorescence intensity) of  
1052 ER-tracker, based on flow cytometry. gMFI for ER-tracker was checked for CD138<sup>high</sup> cells (left  
1053 panel) and mature resting PC (right panel). The measurement was done at day 0 and 4 days after  
1054 activation (LPS and IL4). P values were calculated using two-way ANOVA with post-hoc Bonferroni  
1055 test.

1056 (E) Percentage of mature PC 4 days after activation with LPS and IL4. P value was calculated with  
1057 the Mann-Whitney U test (n=4).

1058 (F) TENT5C expression level after tunicamycin treatment. B cells from WT mice were isolated and  
1059 activated with LPS and IL-4 for 3 days, then treated with tunicamycin in indicated concentration for  
1060 5 hours. The amount of TENT5C mRNA was checked by qPCR. P values were calculated using  
1061 Student's t-test (n $\geq$ 6).

1062 (G) qPCR analysis of UPR markers expression in WT and TENT5C KO cells after ER stress  
1063 induction with tunicamycin. B cells from WT and TENT5C KO mice were isolated and activated  
1064 with LPS and IL-4 for 3 days, then treated with tunicamycin in indicated concentration for 5 hours.  
1065 Bars represent mean fold change values  $\pm$ SD (n=6), P values were calculated using two-way ANOVA  
1066 with post-hoc Bonferroni test.

1067 (H) qPCR analysis of basal ER stress level in B cells WT and TENT5C KO in 3<sup>rd</sup> day after activation  
1068 with LPS and IL-4. P values were calculated using Student's t-test.

1069 (I) Western blot analysis of UPR markers (Xbp1 T – total, S – spliced, Ire1, PERK and ATF6) in  
1070 WT and TENT5C KO cells after ER stress induction with tunicamycin. The  $\alpha$ -tubulin was used as a  
1071 loading control.

1072

1073 **Supplementary Figure 1. Modified direct RNA Sequencing is reliable method to measure**  
1074 **poly(A) tails in responding B cells.** (Related to Figure 1).

1075 (A) Purification of the GST-eIF4E protein. Affinity chromatography and ion-exchange  
1076 chromatography profiles with SDS-PAGE analysis of the purified GST-eIF4E protein.

1077 (B) Validation of the purified eIF4E batch binding to GST beads. Coomassie Blue-stained SDS-  
1078 PAGE gel analysis of purified eIF4E input (lane 1) and flow-through fraction (lane 2) after incubation  
1079 with GST beads.

1080 (C) Agilent 2100 Bioanalyzer electropherogram profiles of total RNA, eIF4E-captured RNA and both  
1081 eIF4E-captured and ribodepleted RNA from WT B cells activated with LPS and IL-4 for 7 days.

1082 (D) The efficiency of mRNA enrichment (higher panel) and rRNA removal (lower panel) after eIF4E-  
1083 capture assessed by qPCR analysis. Total RNA from HEK293T cells were purified with eIF4E  
1084 protein. Then input and purified RNA were subjected to qPCR. Bars represents mean values of  
1085 technical repeats  $\pm$ SD (n=3), P values were calculated using unpaired Student's t-test.

1086 (E) Northern blot analysis of eIF4E-capture efficiency. Total RNA from HEK293T cells were  
1087 purified with eIF4E protein. Then purified RNA and unbound flow-through fraction were compared.

1088 (F) (G) Nanopore-based poly(A) lengths profiling of B cells isolated from WT and TENT5C KO,  
1089 activated with LPS and IL4 for 7 days. Shown are density distribution plots, scaled to a maximum of  
1090 1, for: (F) ribosomal proteins transcripts, (G) mitochondrially encoded cytochrome c oxidase II  
1091 transcript. Vertical dashed lines represent median poly(A) lengths for each condition

1092 (H) Scatter plot showing the relation between mean poly(A) length (x-axis, obtained with Nanopore  
1093 direct RNA sequencing for WT) and expression (y-axis, obtained with Illumina RNAseq), for each  
1094 individual transcript. Immunoglobulins and highly expressed ribosomal proteins transcripts are  
1095 marked in orange and blue, respectively.

1096 (I) qPCR analysis of TENT5C and PABPC1 expression levels in WT B cells (n=4) activated with  
1097 LPS and IL4 for 2-7 days. Pearson's correlation between TENT5C and PABPC1 expression  $r=0.88$ .

1098

1099 **Supplementary Figure 2. Flow cytometry analysis of TENT5C-GFP expression in B cells**  
1100 **subpopulations.** (Related to Figure 3).

1101 (A, B) Histograms showing GFP fluorescence intensity in different B lymphocytes subsets from WT  
1102 or TENT5C-GFP bone marrow (A) and spleen (B). Cells from bone marrow were stained based on  
1103 the CD19, CD43, CD45R, CD24, CD249, IgM and IgD markers. Cells from spleen were stained  
1104 based on the CD19, CD23, CD93, CD45R, CD21, IgM and IgD markers. Staining panels distinguish

1105 following B cell subsets: ProPreB, ProB, PreB, Immature, Early Mature B, Late Mature B,  
1106 Transitional B, T1/T2/T3, Follicular I and II, Marginal Zone Progenitors and Marginal Zone. See also  
1107 gating strategy in Supplementary Figure 3.

1108

1109 **Supplementary Figure 3. Gating strategy of bone marrow B cells staining panel (A) and spleen**  
1110 **B cells staining panel (B).** (Related to Supplementary Figure 2 and Supplementary Figure 6).

1111 (A) The 8-colour flow cytometry analysis of B cells isolated from bone marrow. Cells were stained  
1112 with fluorochrome-conjugated antibodies against: CD19-BUV395, CD43-BV421, IgM-FITC,  
1113 CD249-PE, IgD-BV605, CD45R-APC, CD24-PerCP Cy5.5. When TENT5C-GFP level was checked  
1114 antibody against IgM-BV510 was used (see Supplementary Figure 2). To exclude dead cells  
1115 LIVE/DEAD™ Fixable Near-IR Dead Cell Stain Kit was used.

1116 (B) A 8-colour flow cytometry analysis of B cells isolated from spleen. Cells were stained with  
1117 fluorochrome-conjugated antibodies against: CD19-BUV395, CD23-BV421, IgM-FITC, CD93-PE,  
1118 IgD-BV605, CD45R-APC, CD21-PerCP Cy5.5 When TENT5C-GFP level was checked antibody  
1119 against IgM-BV510 was used (see Supplementary Figure 2). To exclude dead cells LIVE/DEAD™  
1120 Fixable Near-IR Dead Cell Stain Kit was used.

1121

1122 **Supplementary Figure 4. Gating strategy of plasmacytes staining panel.** (Related to Figures 2, 3,  
1123 5, 6 and 7).

1124 A 7-colour flow cytometry analysis of plasma cells isolated from bone marrow or spleen. Cells were  
1125 stained with fluorochrome-conjugated antibodies against: CD19-BUV395, IgM-FITC, IgA-PE,  
1126 CD138-BV605, IgG1-AF647, CD45R-PerCP Cy5.5 (see analysis on Figure 5, 6 and 7). For  
1127 intracellular (cytoplasmic) immunoglobulins measurement (see Figure 2) the same gating strategy  
1128 was applied. When TENT5C-GFP level was analyzed antibody against CD138-PE and CD19-AF700  
1129 was used (see Figure 3), for measuring ER additionally, the ER-tracker-Red was used (Figure 7). To  
1130 exclude dead cells LIVE/DEAD™ Fixable Near-IR or Violet Dead Cell Stain Kit was used.

1131

1132 **Supplementary Figure 5. TENT5C KO B cells activated by innate signaling pathways produce**  
1133 **less antibodies.** (Related to Figure 4)

1134 (A, B) Western blot analysis of IgG heavy and light chains ( $\lambda$  and  $\kappa$ ), intracellular and secreted level,  
1135 in TENT5C KO and WT B cells, activated with TLR agonists: LPS/ IL4 (positive control; lanes 1,2),  
1136 TLR 1/2 (lanes 3,4), TLR4 (lanes 5,6), TLR6/2 (lanes 7,8) and TLR9 (lanes 9,10) for 3 (A) or 5 (B)  
1137 days. GRP94 was used as an activation marker,  $\alpha$ -tubulin and Ponceau S staining were used as loading  
1138 controls.

1139

1140 **Supplementary Figure 6. TENT5C expression does not influence the early stages of B cells**  
1141 **development** (related to Figure 5).  
1142 (A, B) Comparison of different B cells subsets isolated from WT or TENT5C KO from bone marrow  
1143 (A) and spleen (B) based on the flow cytometry results. Subpopulations of ProPreB, ProB, ProB,  
1144 Immature, Early Mature B, Late Mature B, Transitional B, T1/T2/T3, Follicular I & II, Marginal Zone  
1145 Progenitors (MZP) and Marginal Zone (MZ) were checked based on CD19, CD43, CD45R, CD24,  
1146 CD249, IgM, IgD, CD23, CD93, CD21 markers. See gating strategy in Supplementary Figure 3. Data  
1147 are shown as a mean of WT n=8, TENT5C KO n=8 mice, two-way ANOVA with Bonferroni post  
1148 hoc test.  
1149  
1150  
1151  
1152  
1153

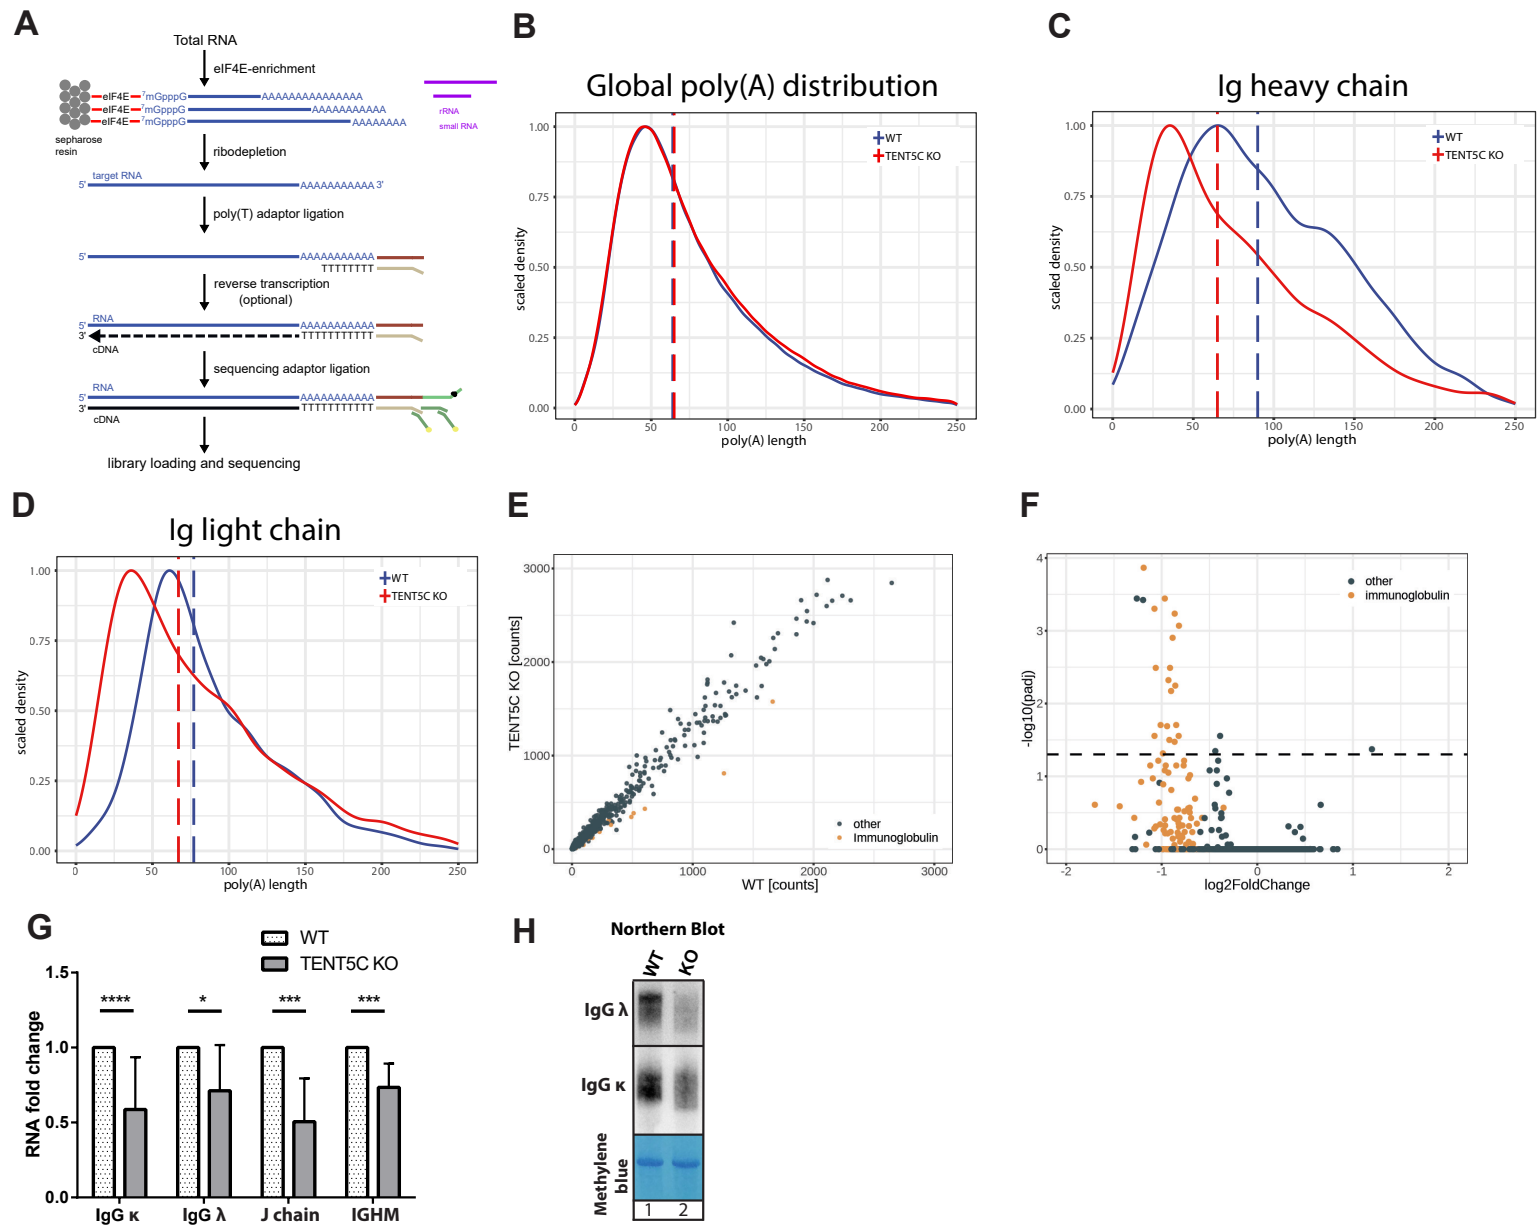

## Figure 2

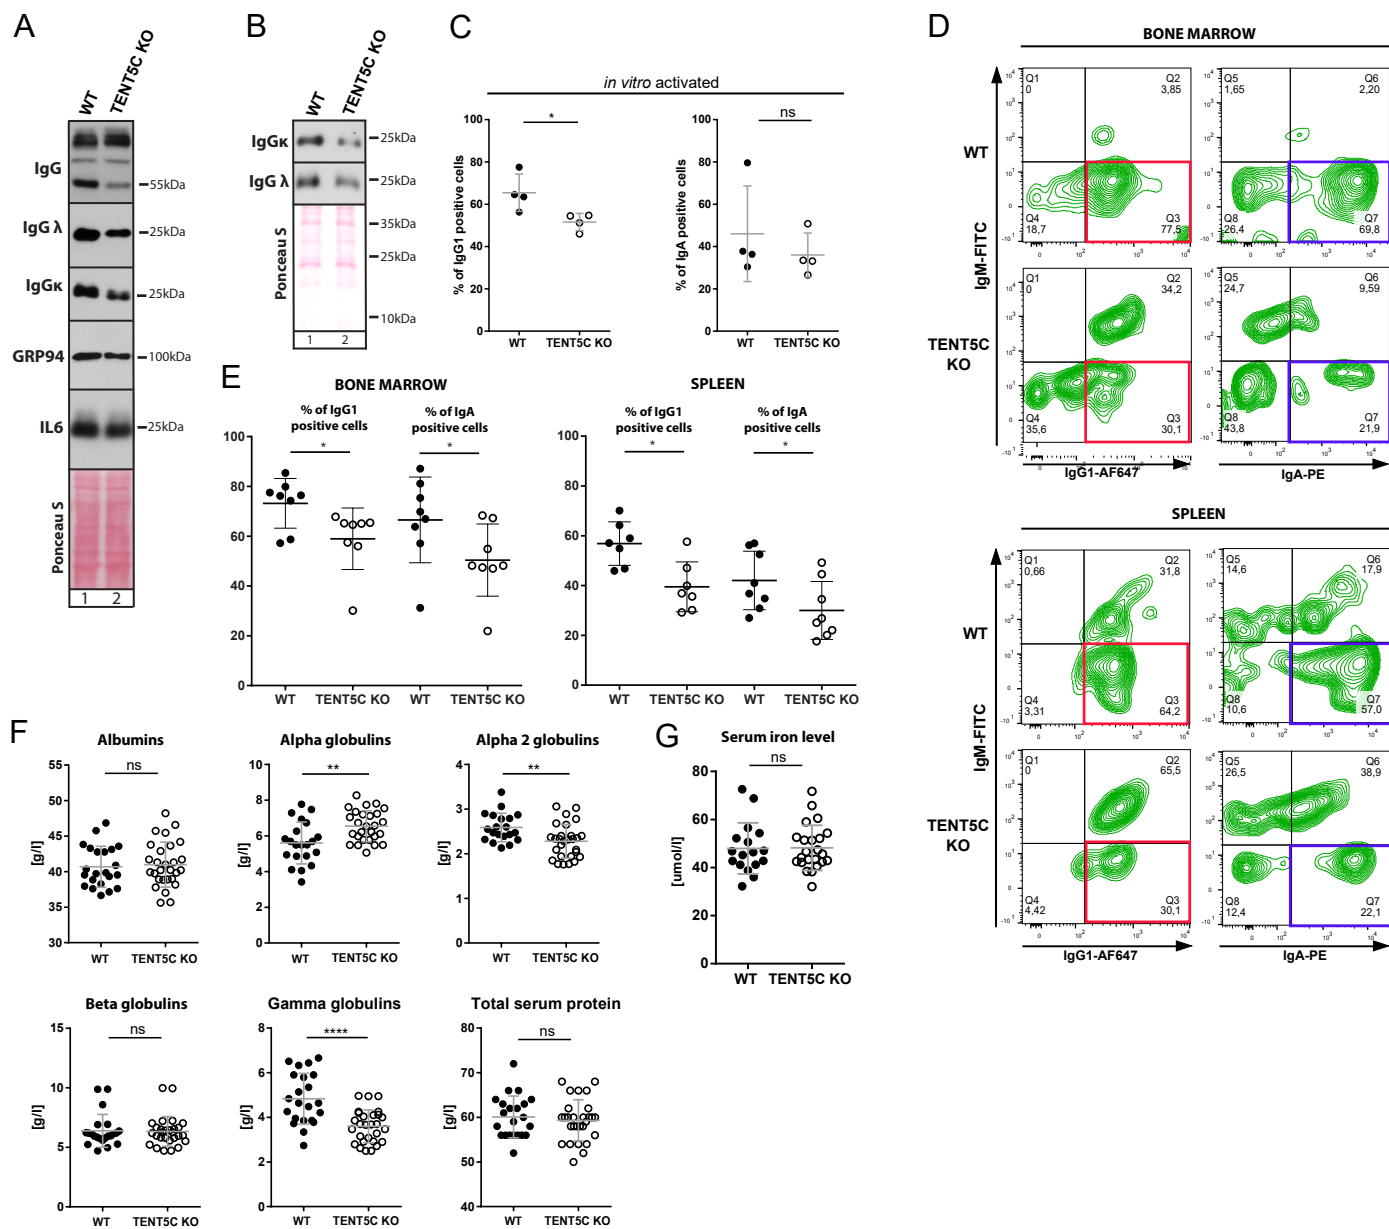



### Figure 3

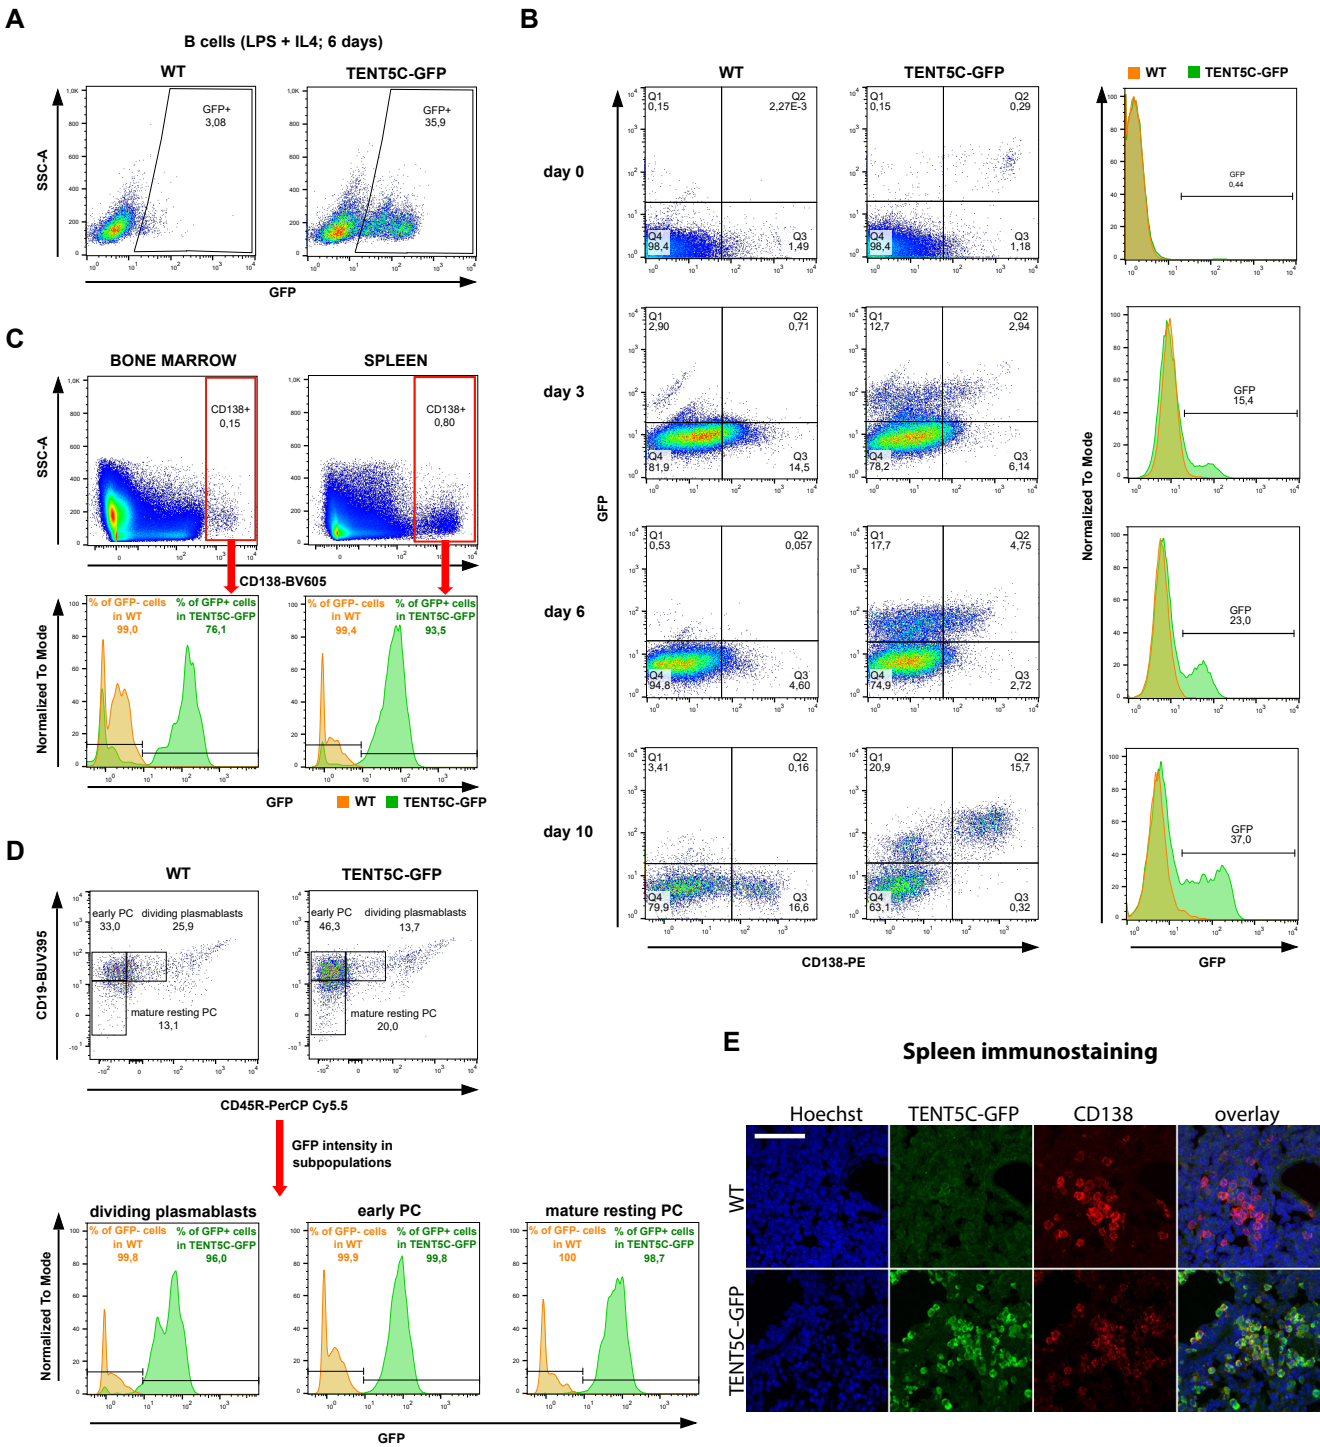

**Figure 4**

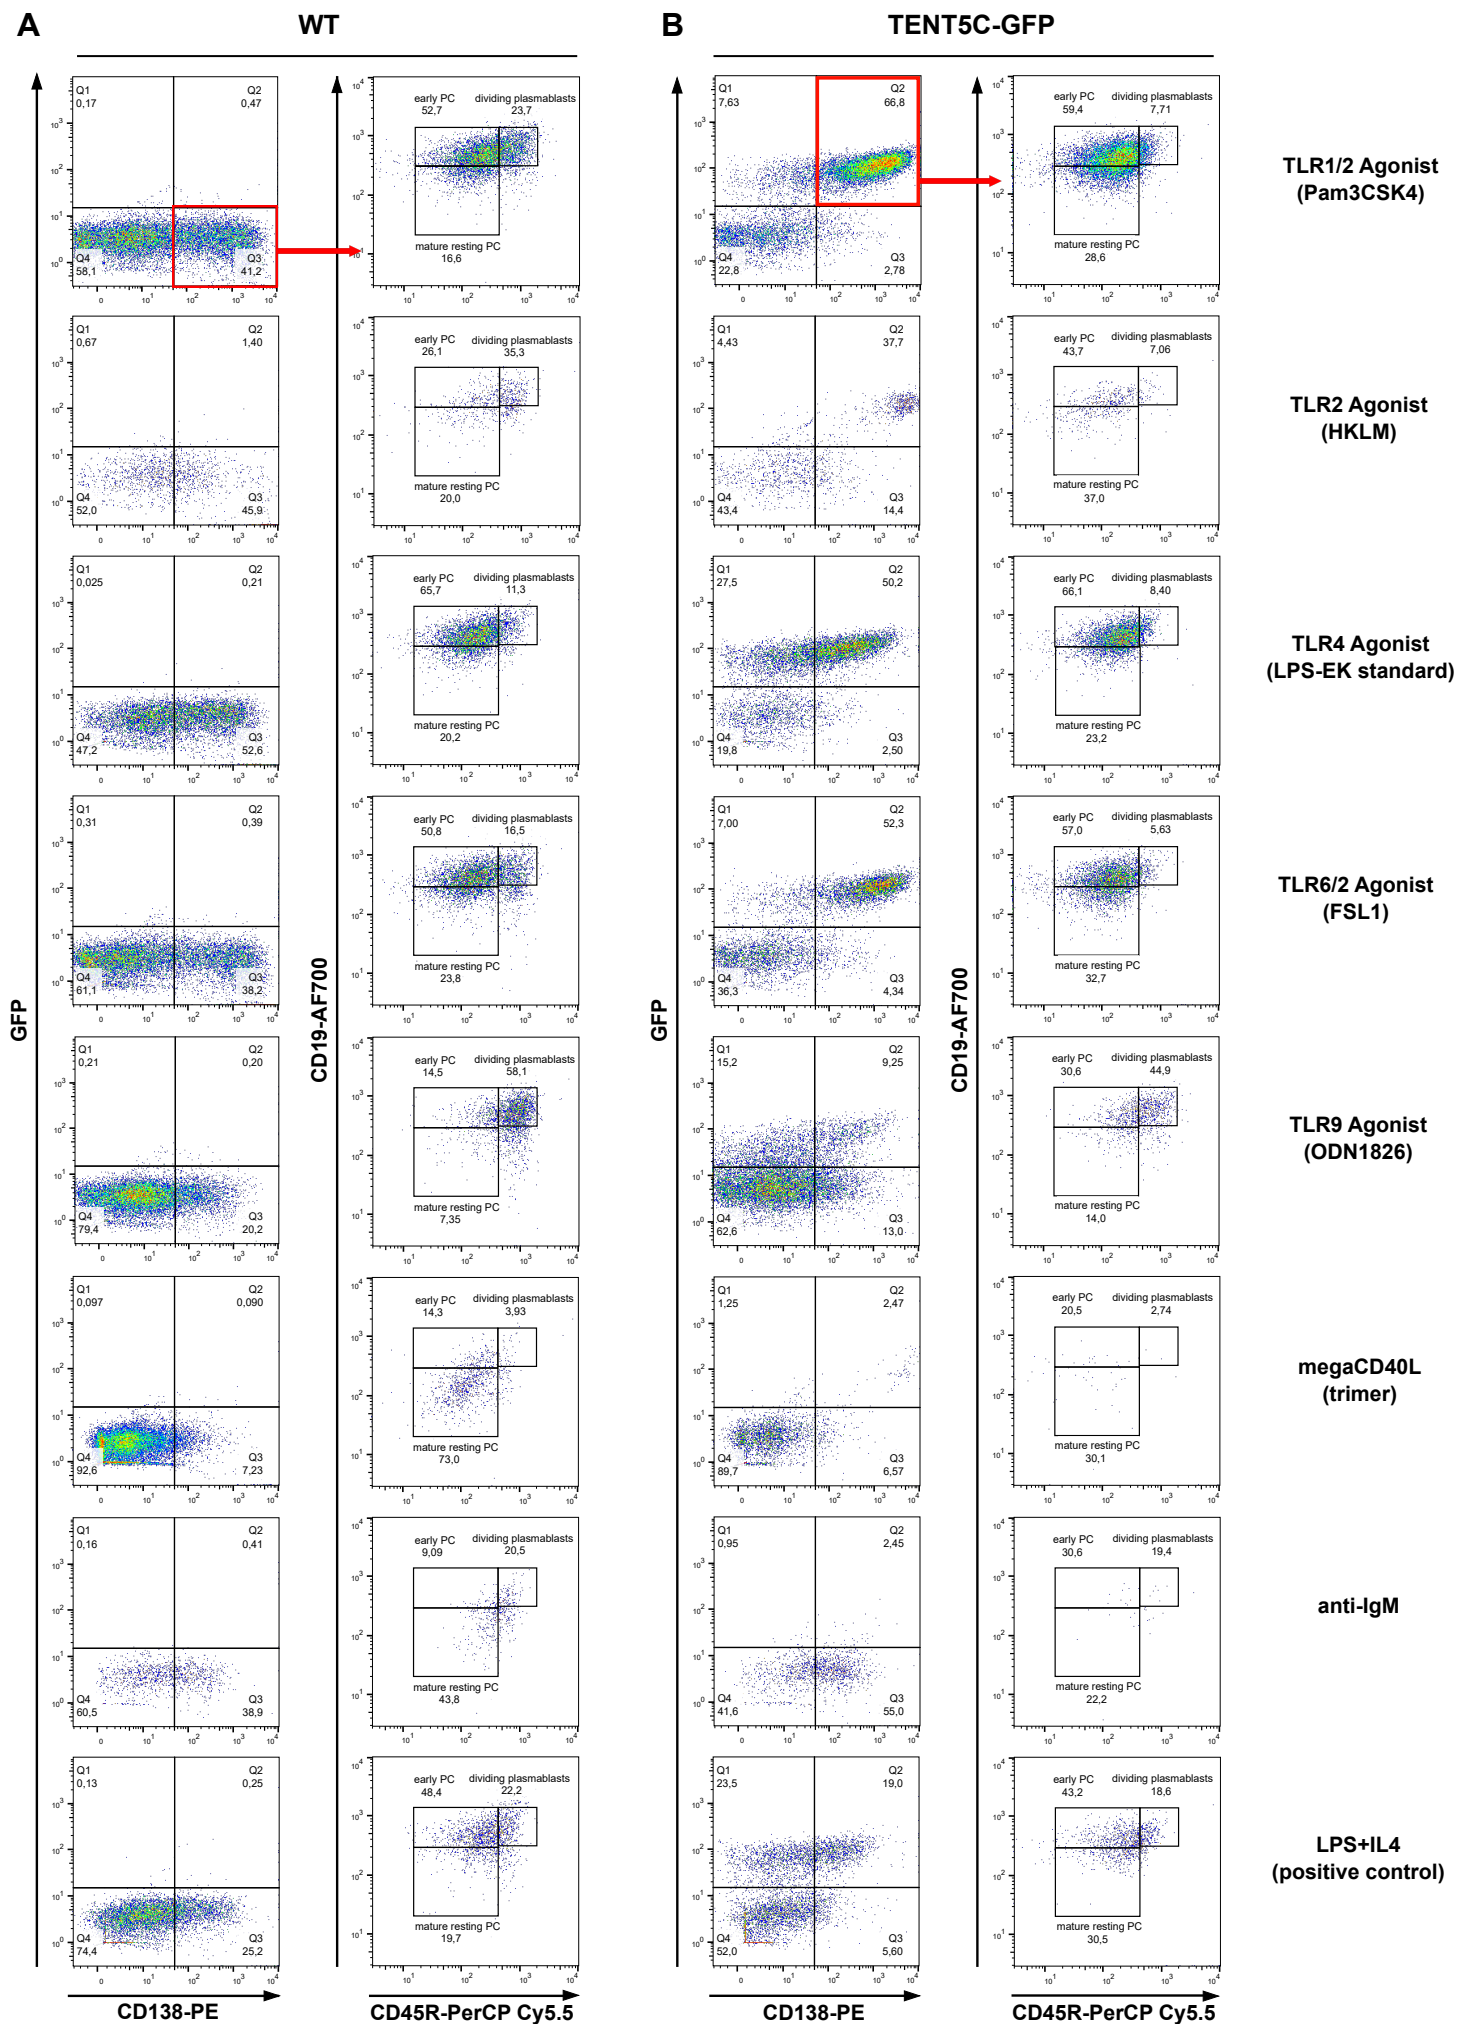

## Figure 5

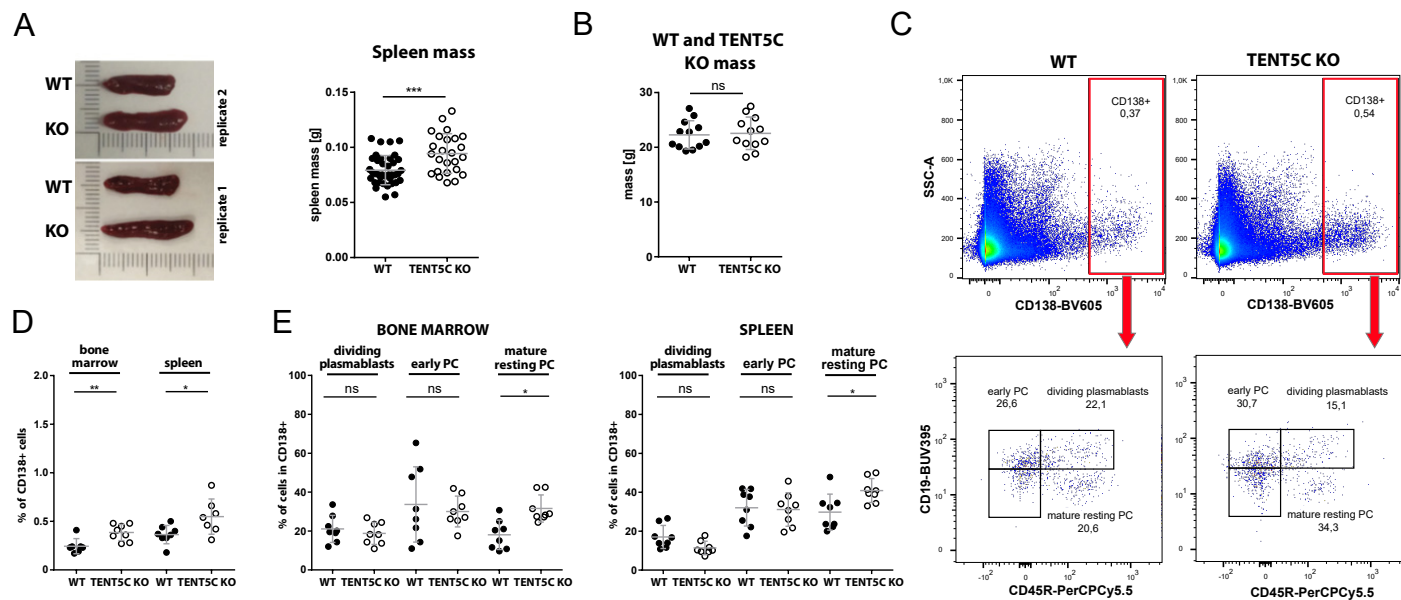

**Figure 6**

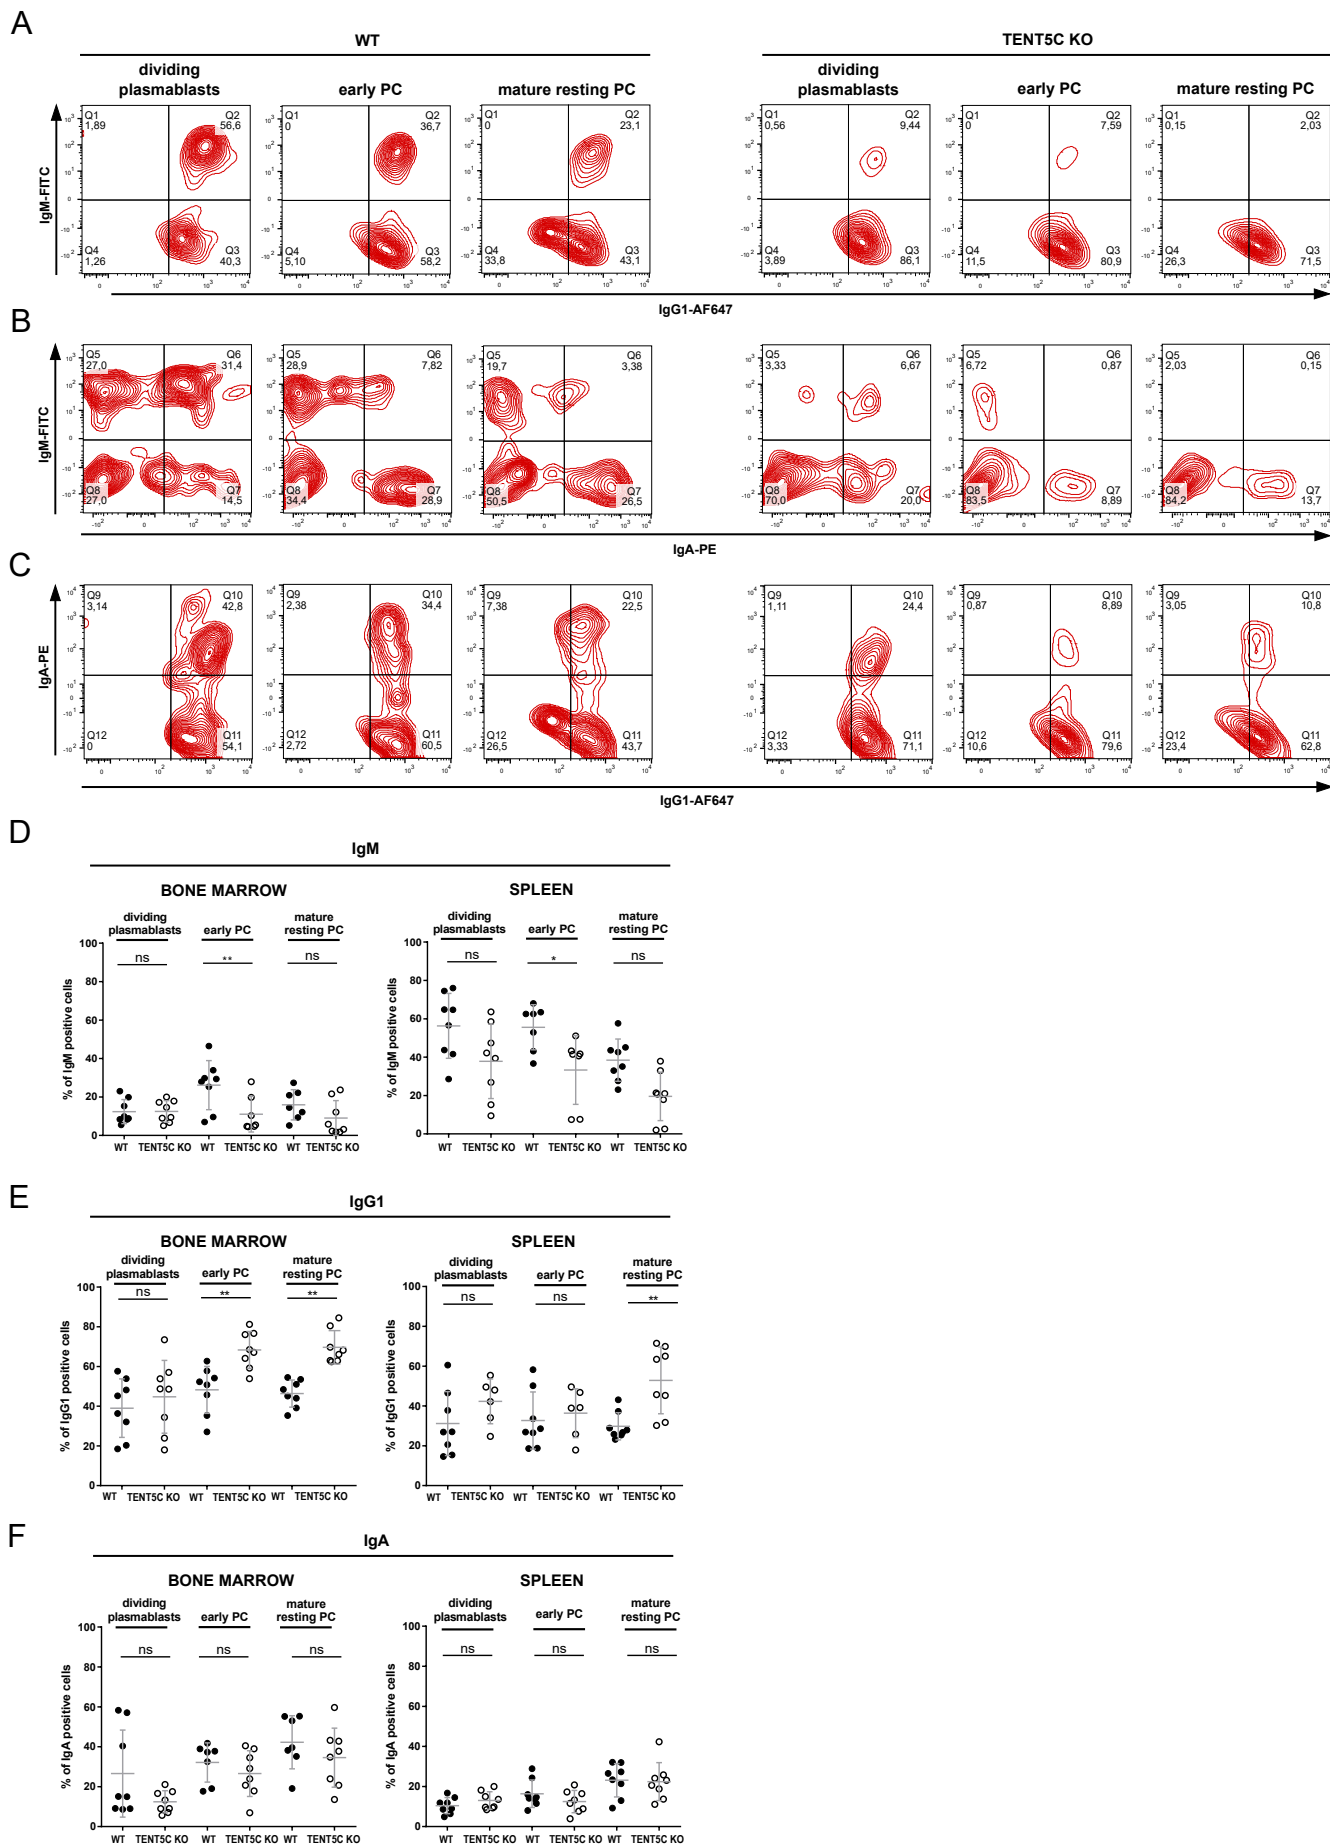

## Figure 7

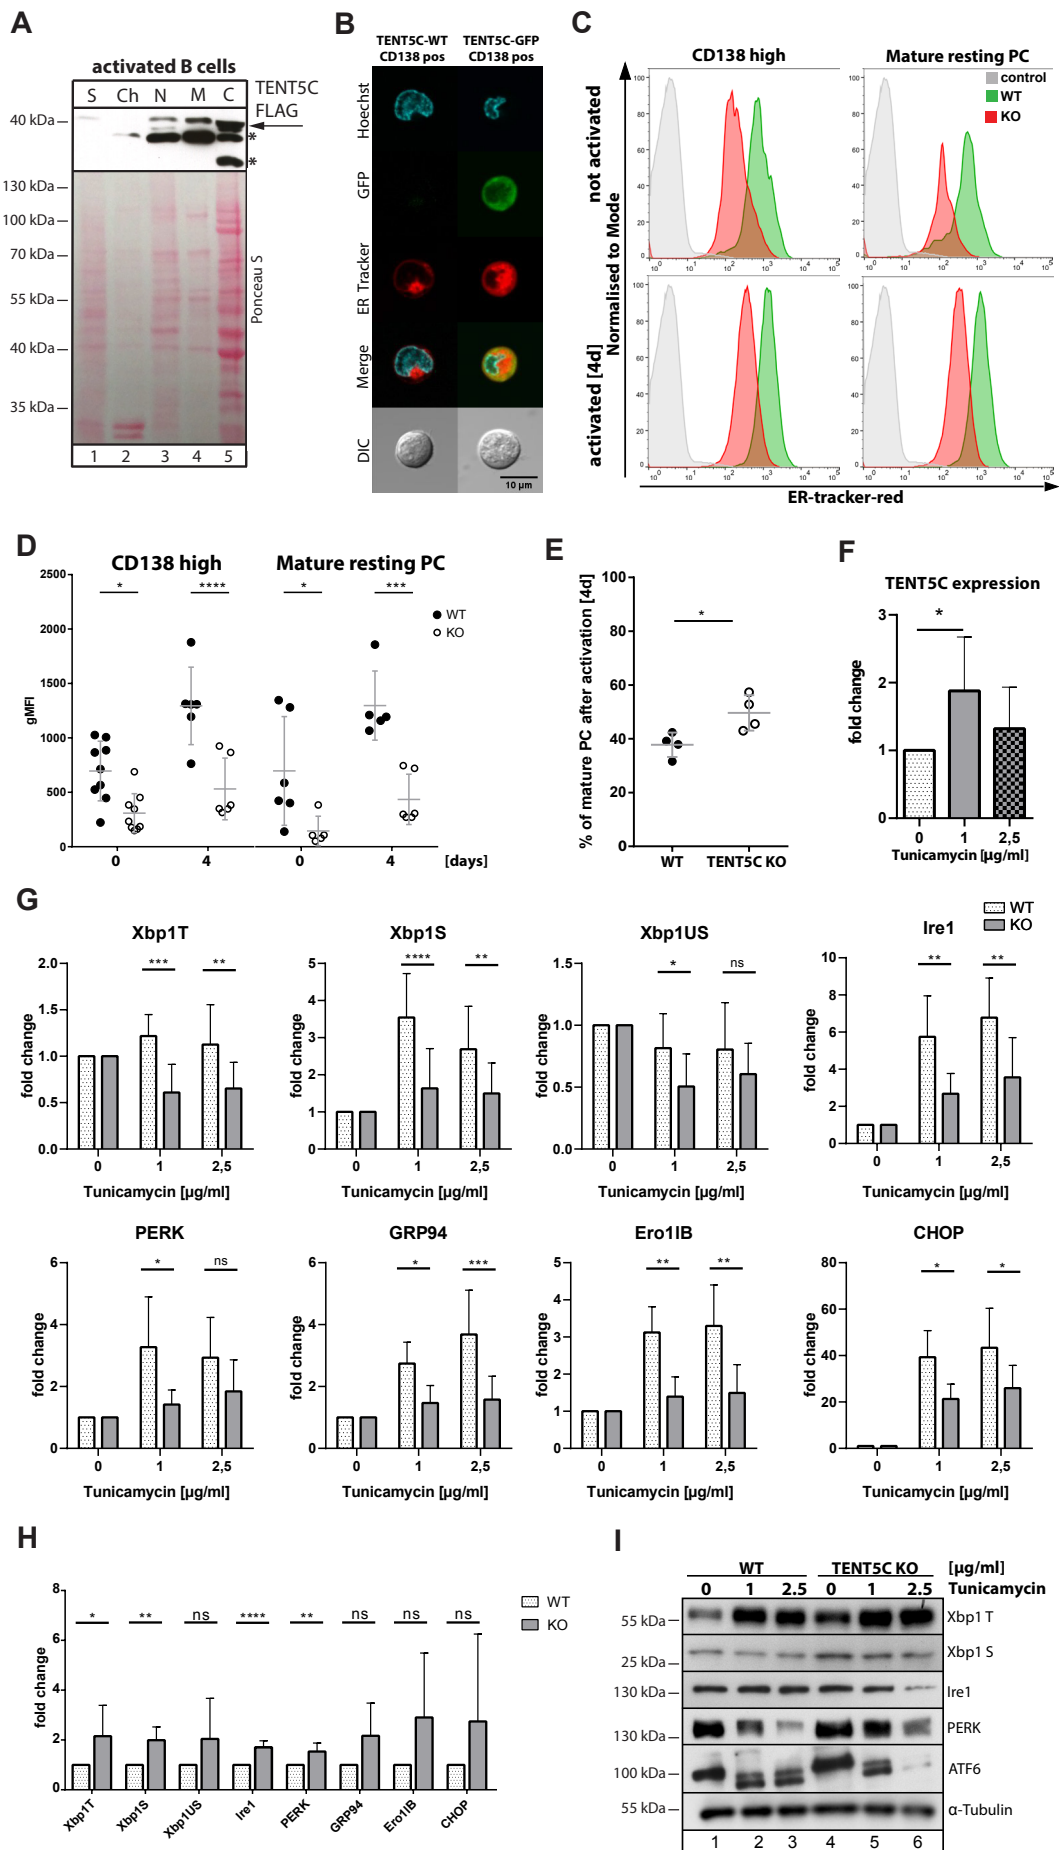

# Supplementary Figure 1

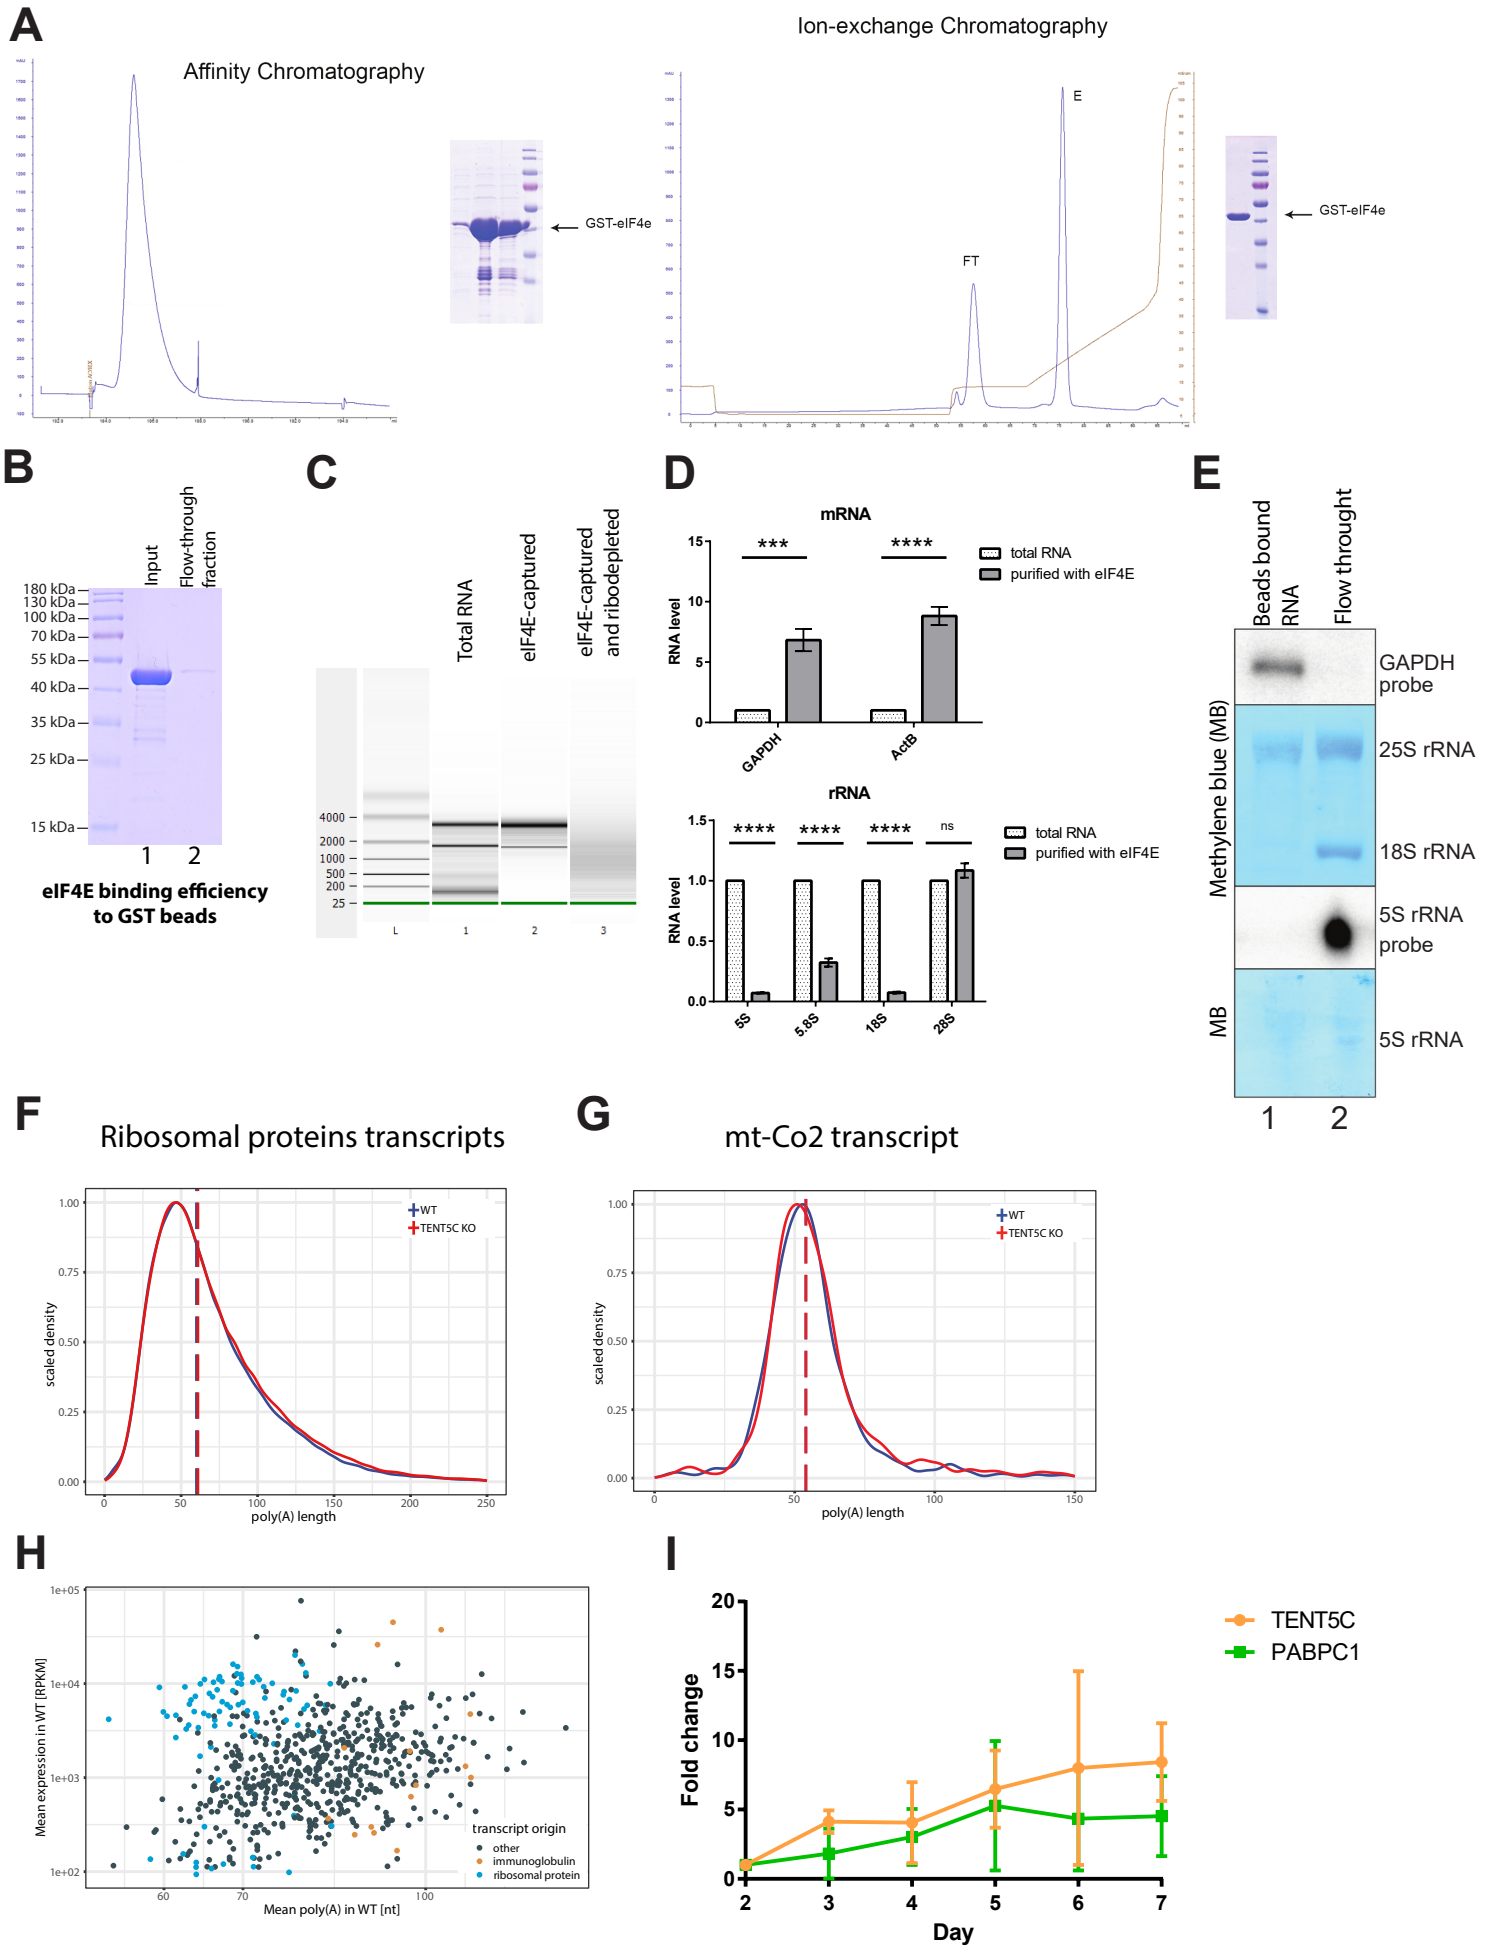



## Supplementary Figure 2

under aCC-BY-NC-ND 4.0 International license.

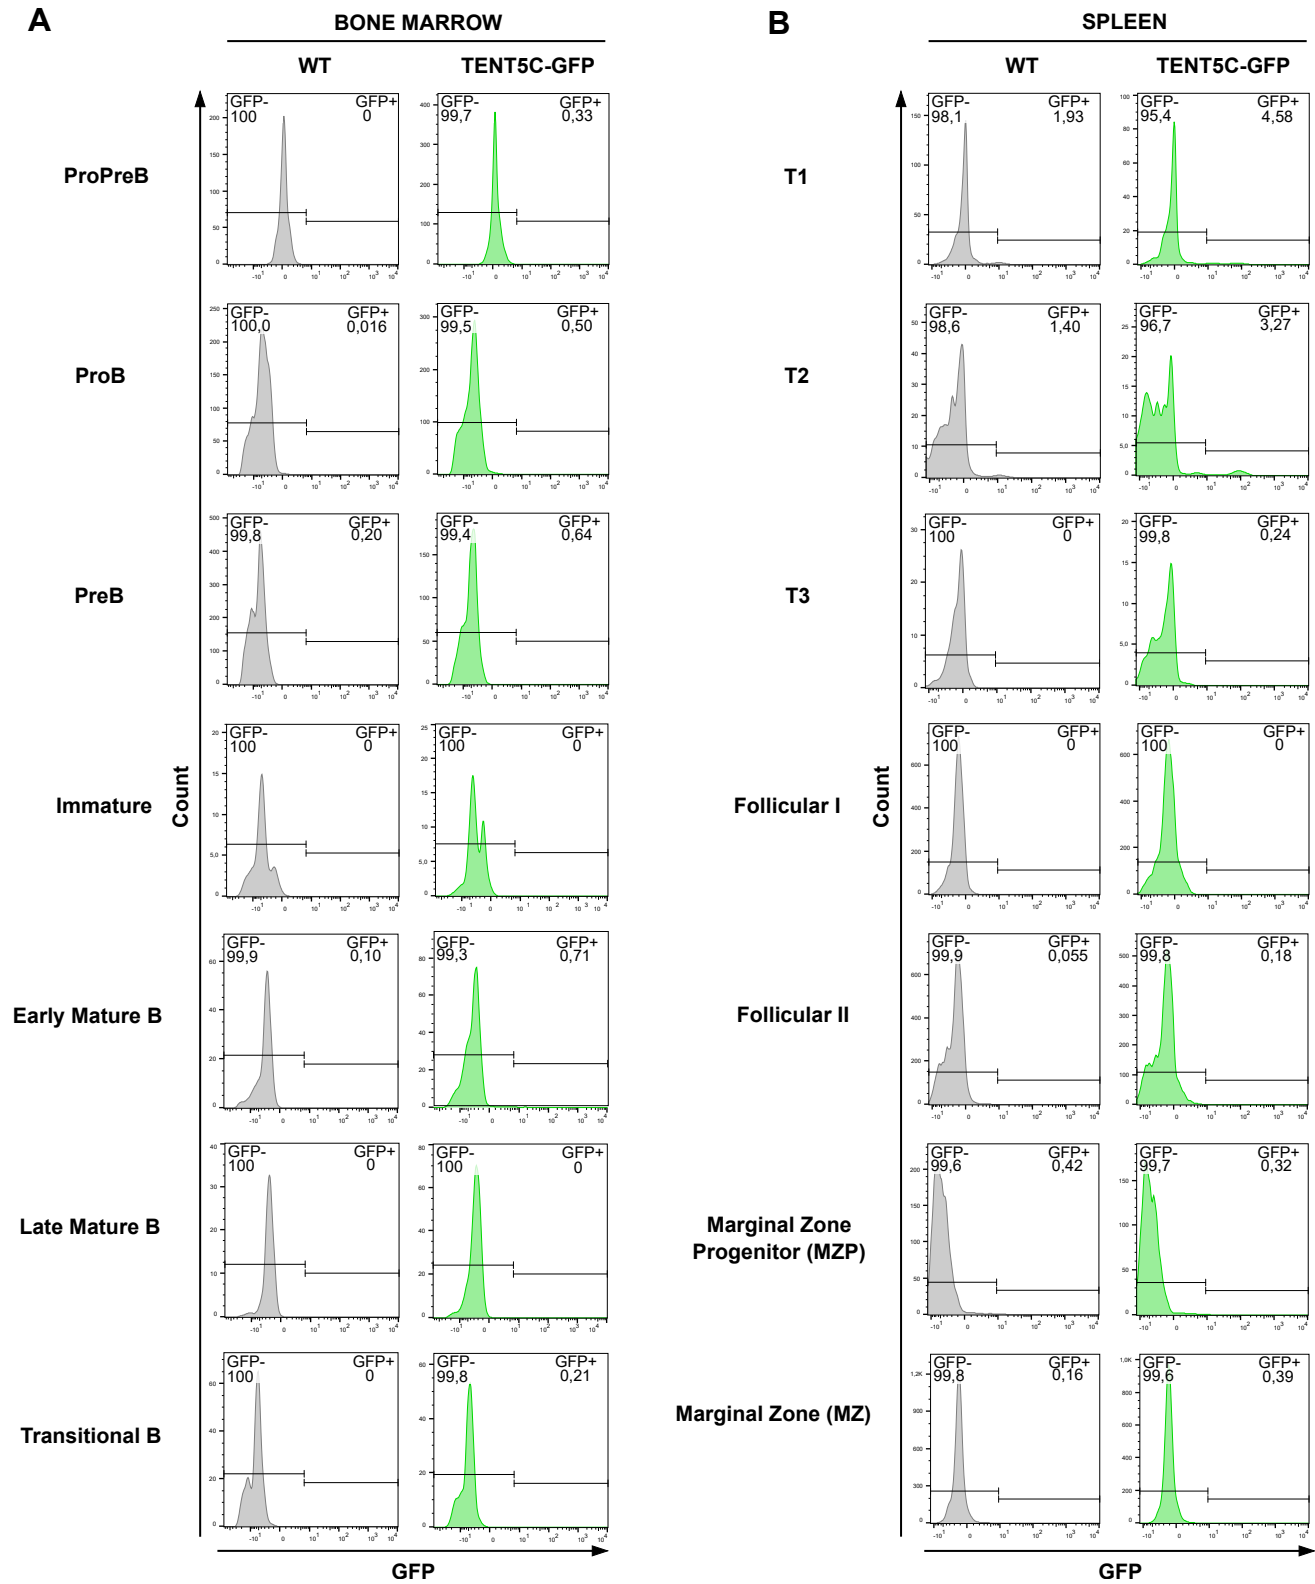

## Supplementary Figure 1

### A. Gating strategy of bone marrow lymphocytes staining panel

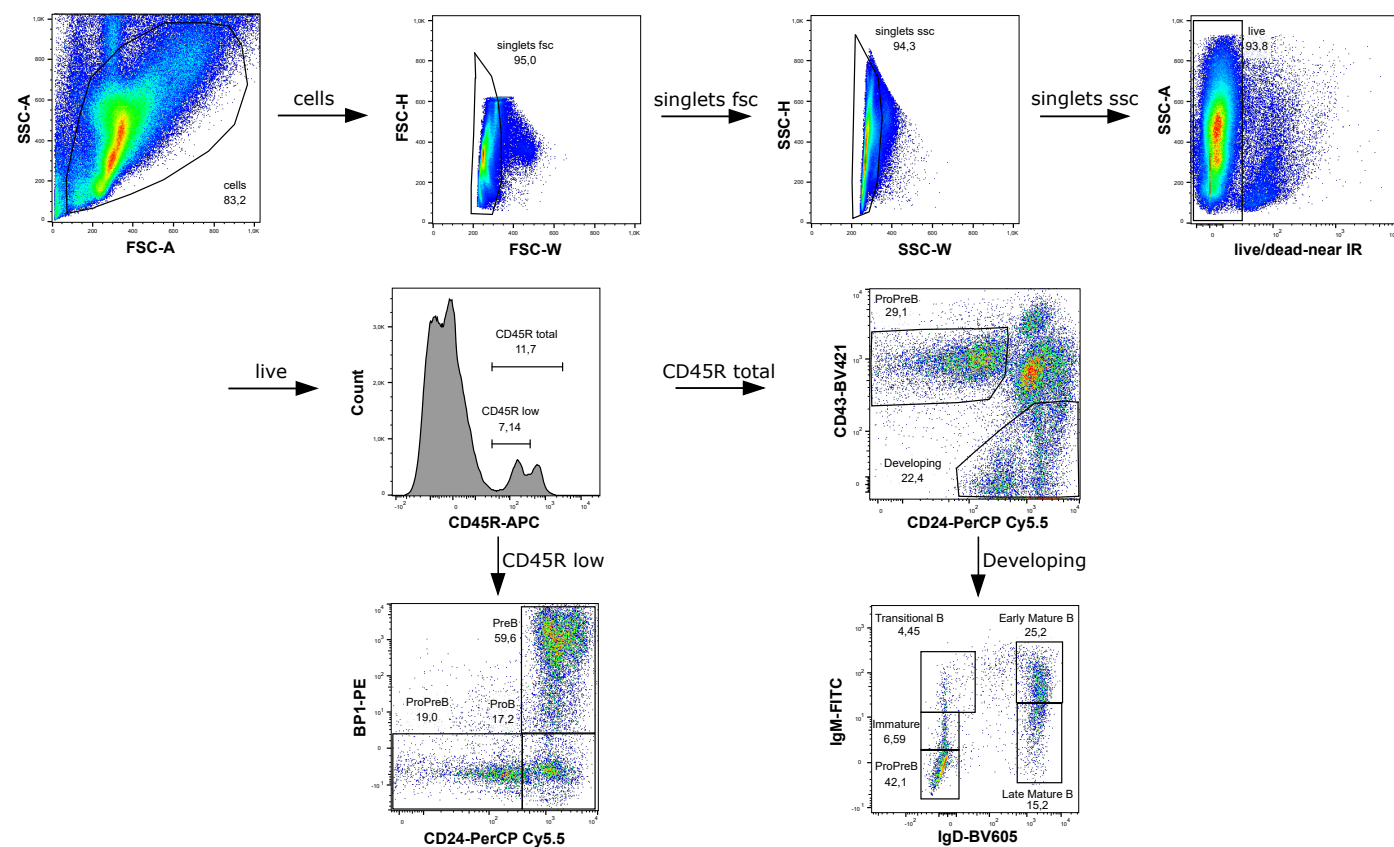

### B. Gating strategy of spleen lymphocytes staining panel

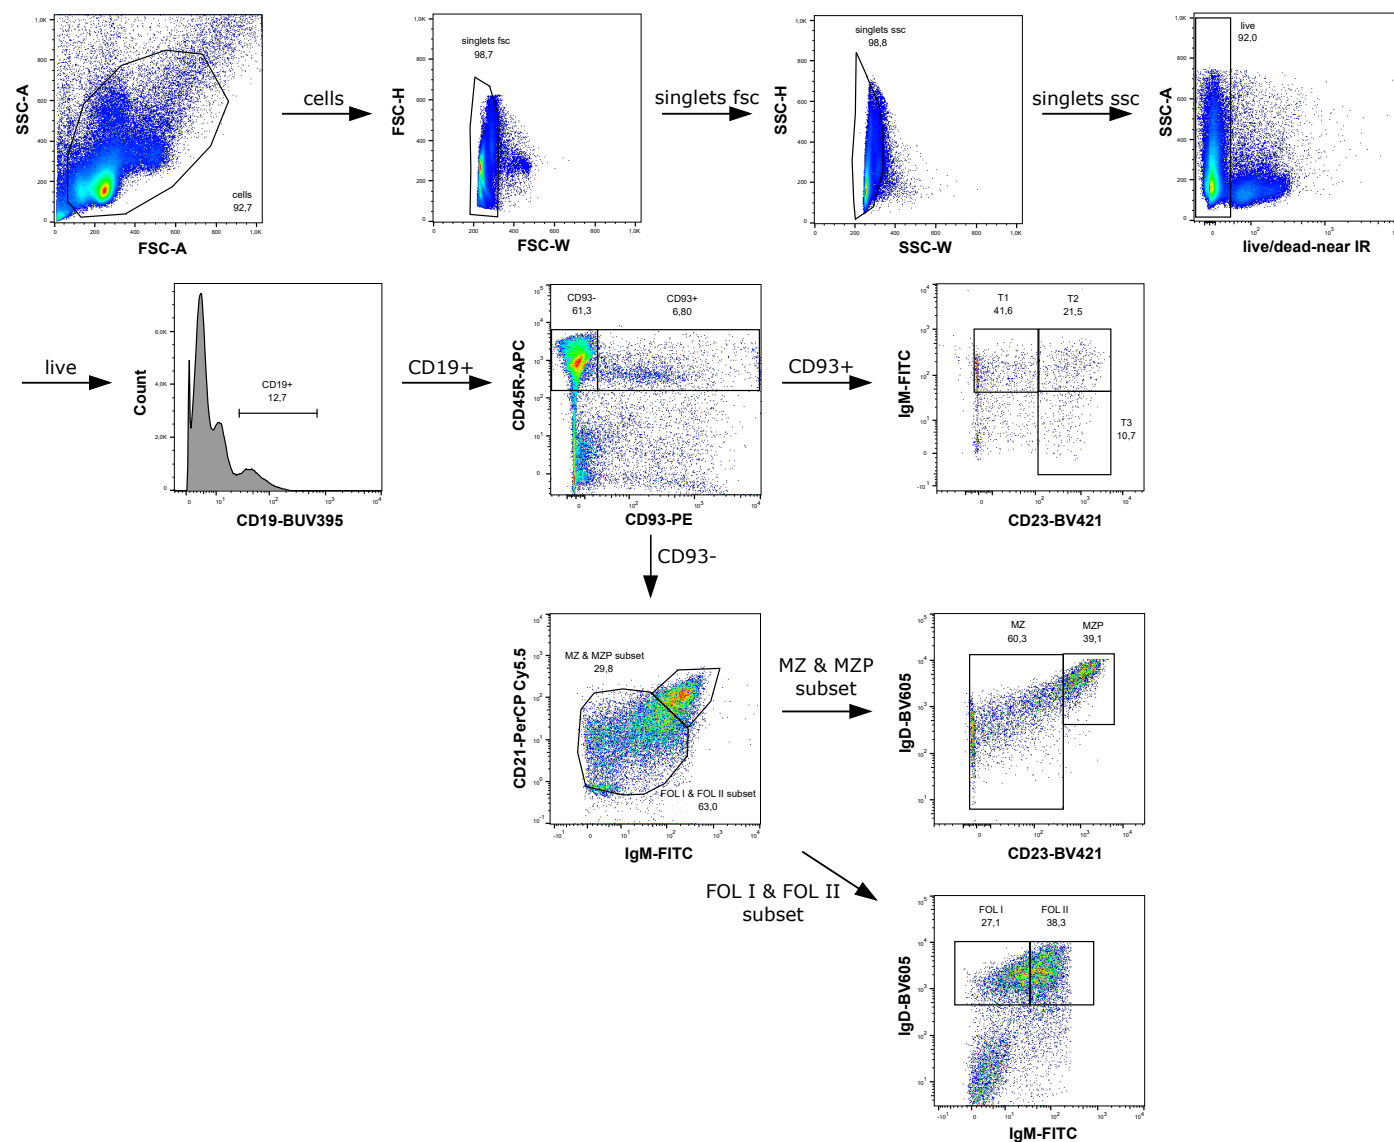

## Supplementary Figure 4

### Gating strategy of plasmacytes staining panel

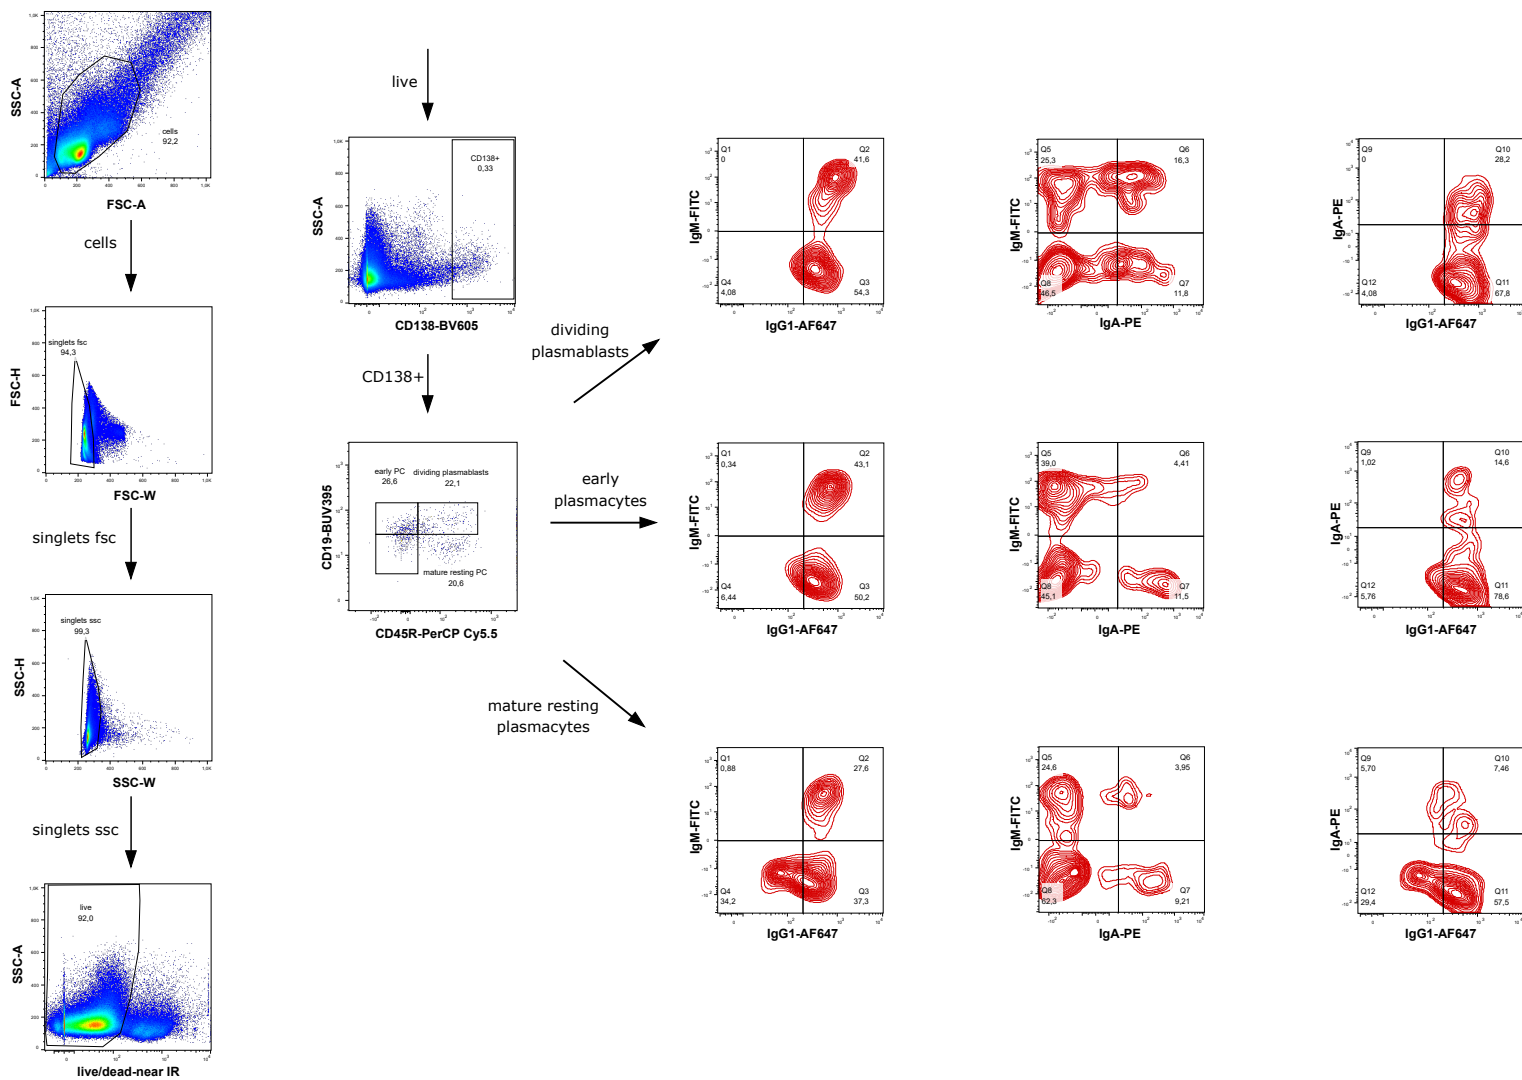

## Supplementary Figure 5

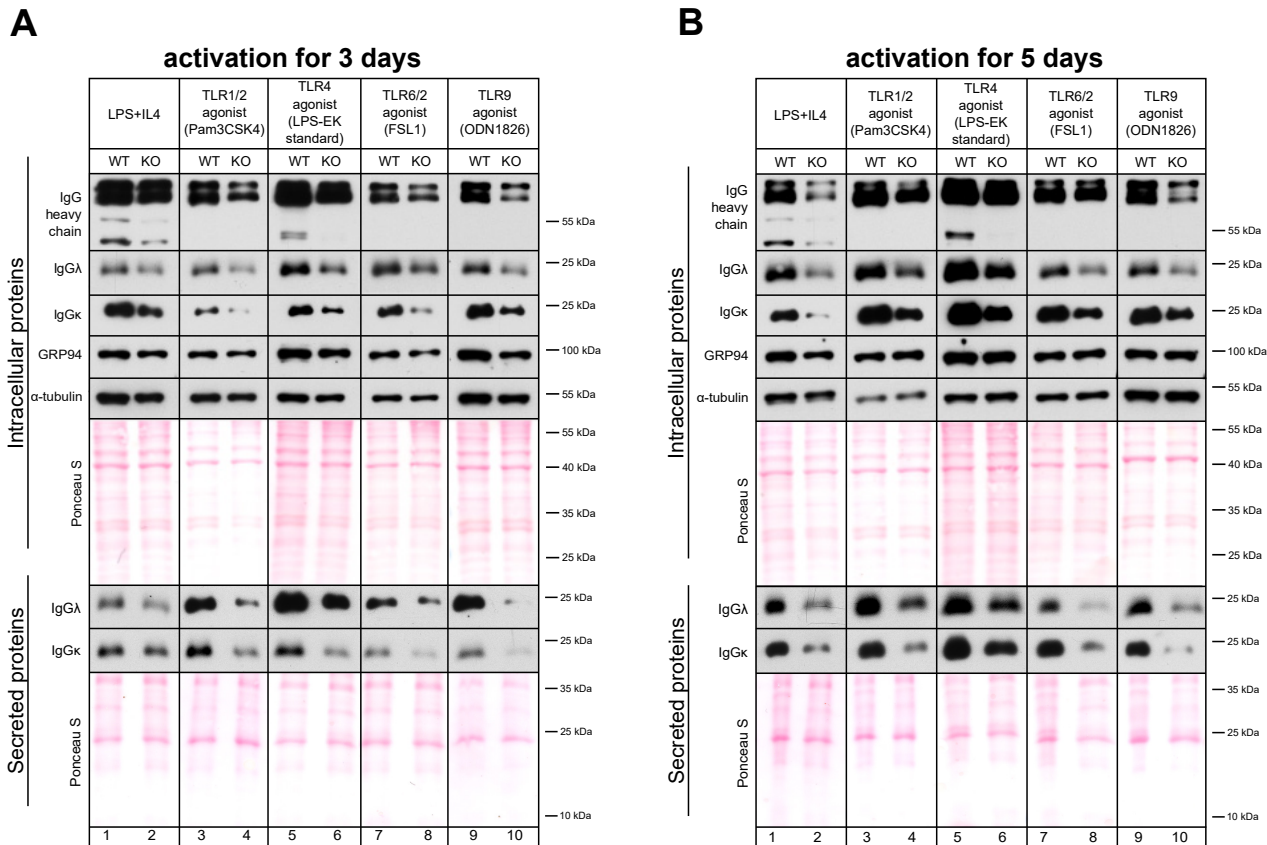

## Supplementary Figure 6

**A**

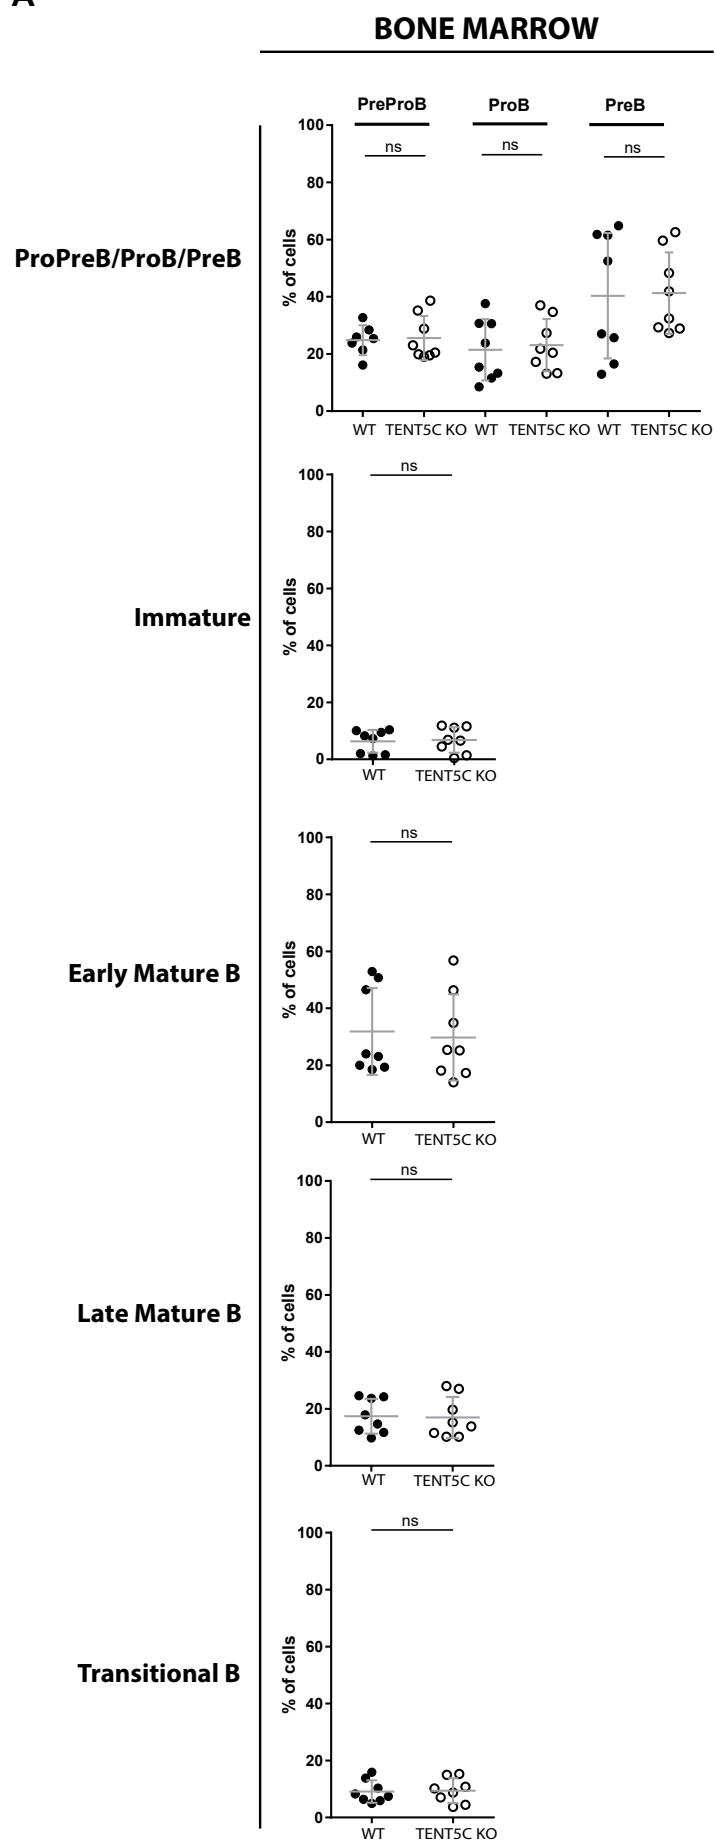

**B**

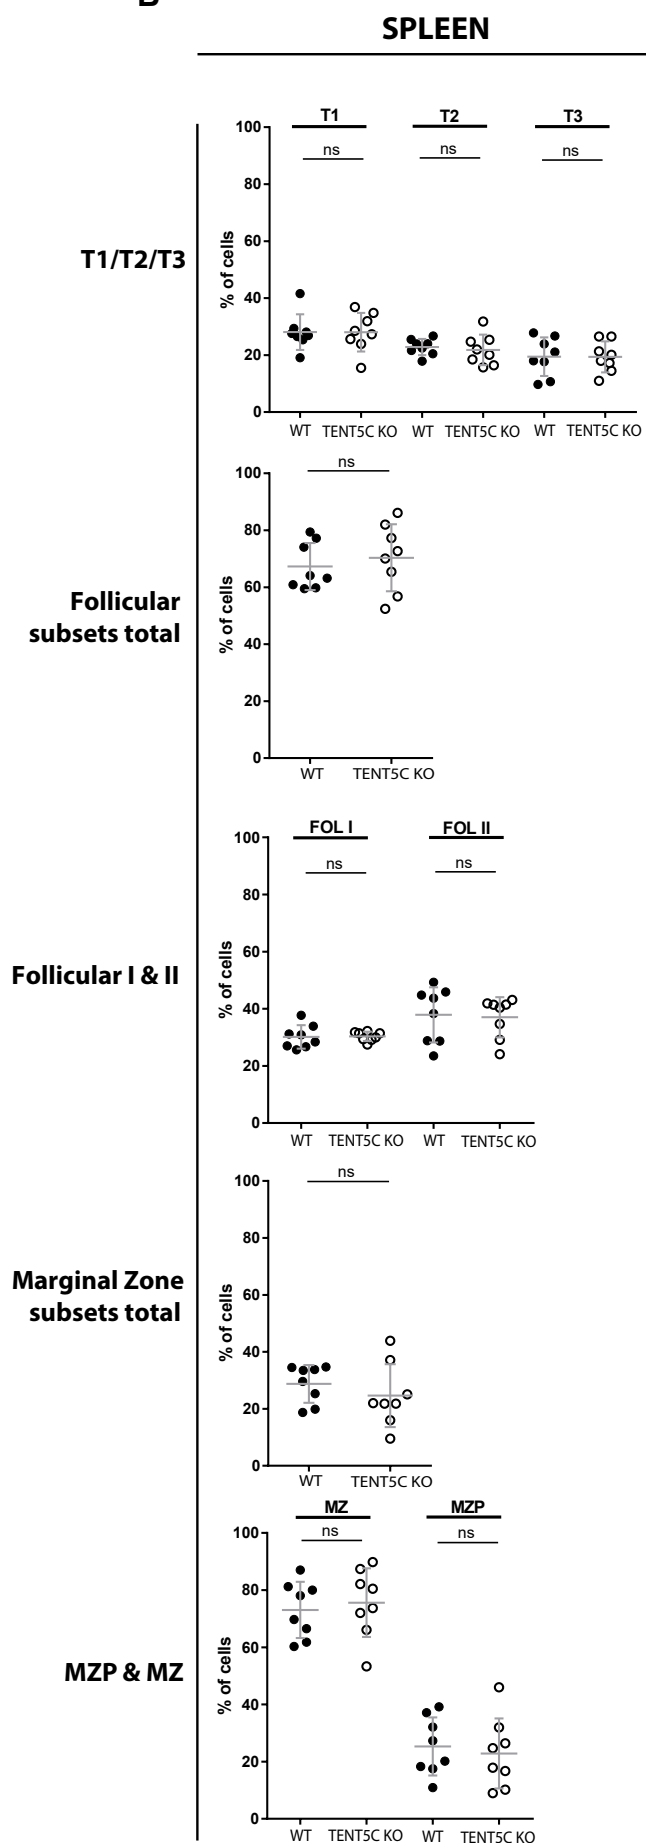

Source: https://www.biorxiv.org/content/biorxiv/early/2019/07/09/686683.full.pdf
